# Supplementary material for: Beyond gene ontology (GO): using biocuration approach to improve the gene nomenclature and functional annotation of rice S-domain kinase subfamily
Source: PeerJ. 2021 Mar 15;9:e11052. doi: 10.7717/peerj.11052 (PMC7971086; doi:10.7717/peerj.11052)
Supplement: Supplemental Information 4 [file peerj-09-11052-s004.xlsx]

## Sheet: Groups-domains
Supplementary Table 1: Proposed 'gene nomenclature' and 'gene descriptions' for rice SDRLK family members based on their gene/protein structure and expression profiles.																					New information from this study
			GO annotations		GENE/TRANSCRIPT STRUCTURE						PROTEIN DOMAINS										Proposed Gene Nomenclature and Gene Description
O. Sativa	O. Sativa RAP geneIDs	Type	Gene Ontology accession: biological process (source: https://www.ebi.ac.uk/QuickGO)	Gene annotation in RAP Database	Gene Size (bp)	Transcript ID	Exons (bp)	Introns	Uniprot ID	Protein Name	protein length	Signal peptide (SP)	LLD (Bulb-type lectin)	SLG (IPR000858 S_locus_glycoprot_dom)	EGF-like	PAN-apple	transmembrane (TM) domain	Ser/Thr-Kinase	Extra-Gnk2-domain	Subcellular Location	O. Sativa RAP geneIDs	Gene Name	Gene Symbol	Gene Description
Receptor-like Kinases (total 67)
SP + LLD + SLG + EGF + PAN-apple + TM + Kinase (8)
LOC_Os01g47810	Os01g0668400	SD-2	GO:0048544 ( recognition of pollen, recognition or rejection of self pollen, self incompatibility), GO:0002229 (defense response to oomycetes), and GO:0042742 (defense response to bacterium)	Similar to predicted protein.	2436	Os01t0668400-00	1 (2388)	0	A0A0P0V6A7	Os01g0668400 protein	795	(1 – 23) SP	(20 – 150) Bulb-type lectin	SLG	278 – 314	(328 – 410) Apple	447 – 473	(507 – 794) kinase		plasma membrane	Os01g0668400	S-Domain receptor like kinase-1	SDRLK-1	Highly expressed in carpel, pistil, and egg cell; down-regulated in response to fungal pathogen R. solani in resistant rice genotype MCR010277.
LOC_Os01g47840	Os01g0668901	SD-2	GO:0048544 ( recognition of pollen, recognition or rejection of self pollen, self incompatibility); GO:0006468 (protein phosphorylation)	Protein kinase, catalytic domain domain containing protein	2532	Os01t0668901-00	1 (2346)	0	A0A0P0V6E9	Os01g0668901 protein	781	(1 – 21) SP	(18 – 147) Bulb-type lectin	SLG	271 – 307	(321 – 403) Apple	437 – 459	(493 – 779) Protein kinase		plasma membrane	Os01g0668901	S-Domain receptor like kinase-2	SDRLK-2	Expresses preferentially in flower; down-regulated under submergence; up-regulated in response to bacterial and fungal infection
LOC_Os01g57560	Os01g0784700	SD-1	GO:0048544 ( recognition of pollen, recognition or rejection of self pollen, self incompatibility); GO:0006468 (protein phosphorylation)	Serine/threonine protein kinase-related domain containing protein	7836	Os01t0784700-00	8 (759;562;132;176;211;205;151;312)	7	Q0JIQ1	Os01g0784700 protein	835	(1-26) SP	(27-154) Bulb-type lectin	SLG	293-329	(348-436) Apple	451-474	(527 – 803) Protein kinase		plasma membrane	Os01g0784700	S-Domain receptor like kinase-3	SDRLK-3	Expresses in flower and leaf; down-regulated in response to Xanthomonas oryzae pv. oryzae in resistant rice genotypes; up-regulated in response to R. solani.
LOC_Os05g42210	Os05g0501400	SD-1	GO:0048544 ( recognition of pollen, recognition or rejection of self pollen, self incompatibility); GO:0006468 (protein phosphorylation)	Similar to Receptor-like protein kinase 5.	5835	Os05t0501400-01	7 (1297;135;173;211;238;151;309)	6	Q60EJ2	Os05g0501400 protein	837	(1 – 22) SP	(23 – 152) Bulb-type lectin	SLG	289 – 325	(344 – 428) Apple	444 – 467	(519 – 806) Protein kinase		plasma membrane	Os05g0501400	S-Domain receptor like kinase-4	SDRLK-4	Expresses in seed only under normal growth condition, but expresses in seedlings under submergence.
LOC_Os06g37750	Os06g0575400	SD-2	GO:0048544 ( recognition of pollen, recognition or rejection of self pollen, self incompatibility); GO:0006468 (protein phosphorylation)	Serine/threonine protein kinase-related domain containing protein	2671	Os06t0575400-01	1 (2409)	0	Q5Z601	Os06g0575400 protein	802	(1 – 23) SP	(24 – 148) Bulb-type lectin	SLG	279 – 315	(321 – 406) Apple	454 – 478	(513 – 798) Protein kinase		plasma membrane	Os06g0575400	S-Domain receptor like kinase-5	SDRLK-5	Expresses in seedlings, flower, and root; down-regulated in response to drought in a tolerant genotype and up-regulated under submergence.
LOC_Os07g36590	Os07g0551300	SD-1	GO:0048544 ( recognition of pollen, recognition or rejection of self pollen, self incompatibility); GO:0006468 (protein phosphorylation)	Similar to KI domain interacting kinase	6482	Os07t0551300-01	9 (683;311;330;108;221;211;238;151;309)	8	Q7EZ32	Os07g0551300 protein	853	(1 – 27) SP	(32 – 164) Bulb-type lectin	SLG	301 – 339	(358 – 438) Apple	446 – 470	(535 – 786) Protein kinase		plasma membrane	Os07g0551300	S-Domain receptor like kinase-6	SDRLK-6	Highly expressed in many tissues; up-regulated in response to drought and submergence; down-regulated in response to Xanthomonas oryzae pv. oryzae in resistant genotype.
LOC_Os11g03820	Os11g0133001	SD-2	GO:0048544 ( recognition of pollen, recognition or rejection of self pollen, self incompatibility); GO:0006468 (protein phosphorylation)	Similar to Ser/Thr protein kinase	2536	Os11t0133001-01	1 (2385)	0	Q0IUV4	Os11g0132900 protein	794	(1 – 32) SP	(1 – 134) Bulb-type lectin	SLG	268 – 304	(318 – 398) Apple	446 – 471	(508 – 787) Protein kinase		plasma membrane	Os11g0133001	S-Domain receptor like kinase-7	SDRLK-7	Expresses in seed and shoot under normal growth conditions; up-regulated in response to B. glumae in resistant genotype CL 161.
LOC_Os12g03640	Os12g0130200	SD-2	GO:0048544 ( recognition of pollen, recognition or rejection of self pollen, self incompatibility); GO:0006468 (protein phosphorylation)	Similar to D-mannose binding lectin family protein, expressed.	2042	Os12t0130200-00	1 (1869)	0	Q2QY71	Os12g0130200 protein	729	(1 – 27) SP	(38 – 167) Bulb-type lectin	SLG	203 – 239	(253 – 333) Apple	381 – 406	(443 – 722) Protein kinase			Os12g0130200	S-Domain receptor like kinase-8	SDRLK-8	Expresses ubiquitously, high expression in root and flower; up-regulated in resistant genotype CL 161 in response to B. glumae and down-regulated in response to Rice Stripe Virus.
LLD + SLG + EGF + PAN-apple + TM + Kinase (2)
LOC_Os03g12150	Os03g0221700	SD-2	GO:0048544 ( recognition of pollen, recognition or rejection of self pollen, self incompatibility); GO:0006468 (protein phosphorylation)	Serine/threonine protein kinase-related domain containing protein.	2830	Os03t0221700-02	1 (2532)	0	Q8H821	D-mannose binding lectin family protein, expressed	843		(21 – 150) Bulb-type lectin	SLG	299 – 335	(354 – 431) Apple	457 – 484	(513 – 802) Protein kinase		plasma membrane	Os03g0221700	S-Domain receptor like kinase-9	SDRLK-9	Ubiquitous expression, but high expression in shoot; up-regulated under submergence/B. glumae in resistant genotype CL 161 at flowering stage.
LOC_Os12g34320	Os12g0527700	SD-2	GO:0048544 ( recognition of pollen, recognition or rejection of self pollen, self incompatibility); GO:0006468 (protein phosphorylation)	Serine/threonine protein kinase-related domain containing protein.	2671	Os12t0527700-01	1 (2475)	0	Q2QPI9	D-mannose binding lectin family protein, expressed	824		(78 – 196) Bulb-type lectin	IPR000858 S_locus_glycoprot_dom	314-350	(364 – 438) Apple	52 – 73 and 480 – 503	(537 – 824) Protein kinase		plasma membrane	Os12g0527700	S-Domain receptor like kinase-10	SDRLK-10	Highly expressed in carpel, pistil, and egg; down-regulated in response to drought/chilling in tolerant genotypes; down-regulated in response to Xanthomonas oryzae pv. oryzae and RSV infection; upregulated under submergence as well as in rice transgenic lines over-expressing SUB1A, ERF67 and ERF66 transcription factors.
SP + LLD + SLG + PAN-apple + TM + Kinase (38)
LOC_Os01g06240	Os01g0155200	SD-2	GO:0048544 ( recognition of pollen, recognition or rejection of self pollen, self incompatibility); GO:0006468 (protein phosphorylation)	Similar to H0525E10.8 protein.	2551	Os01t0155200-00	1 (2496)	0	Q943Q1	Os01g0155200 protein	831	(1 – 25) SP	(27 – 161) Bulb-type lectin	SLG		(357 – 442) Apple	454 – 478	(506 – 794) Protein kinase		plasma membrane	Os01g0155200	S-Domain receptor like kinase-11	SDRLK-11	Expresses in leaf and seed only; up-regulated under drought and chilling in tolerant genotypes; upregulated in response to B. glumae in a resistant rice genotype CL 161.
LOC_Os01g47820	Os01g0668600	SD-2	GO:0048544 ( recognition of pollen, recognition or rejection of self pollen, self incompatibility); GO:0006468 (protein phosphorylation)	Curculin-like (mannose-binding) lectin domain containing protein.	2577	Os01t0668600-00	1 (2394)	0	Q8W059	Os01g0668600 protein	797	(1 – 20) SP	(18 – 154) Bulb-type lectin	SLG		(320 – 410) Apple	449 – 474	(508 – 795) Protein kinase		plasma membrane	Os01g0668600	S-Domain receptor like kinase-12	SDRLK-12	Ubiquitous expression, but high expression in root and flower; up-regulated in response to B. glumae in resistant rice genotype CL 161.
LOC_Os01g47900	Os01g0669100	SD-2	GO:0048544 ( recognition of pollen, recognition or rejection of self pollen, self incompatibility); GO:0006468 (protein phosphorylation)	S-domain receptor-like kinase, OsPR1b-interacting factor, Resistance protein, Grain yield, Disease resistance (Os01t0669100-01);Similar to Resistance protein candidate (Fragment). (Os01t0669100-02)	2801	Os01t0669100-01	1 (2460)	0	Q8W054	Os01g0669100 protein	819	(1 – 27) SP	(31 – 154) Bulb-type lectin	SLG		(330 – 420) Apple	464 – 489	(524 – 817) Protein kinase		plasma membrane	Os01g0669100	S-domain receptor-like kinase-LSK1	SDRLK-LSK1	Highly expressed in nodes, but also expresses in leaf, and root; expression changes in response to the exogenous application of growth hormones and abiotic stresses; up-regulated in response to chilling and submergence; down-regulated in response to drought in tolerant rice genotypes; up-regulated in response to Xanthomonas oryzae pv. oryzae. Over-expression of a truncated version of LSK1 (the ex…
LOC_Os01g48000	Os01g0670100	SD-2	GO:0048544 ( recognition of pollen, recognition or rejection of self pollen, self incompatibility); GO:0006468 (protein phosphorylation)	Serine/threonine protein kinase-related domain containing protein.	2690	Os01t0670100-01	1 (2445)	0	Q0JKJ3	Os01g0670100 protein	814	(1 – 16) SP	(22 – 155) Bulb-type lectin	SLG		(331 – 414) Apple	458 – 483	(518 – 812) Protein kinase		plasma membrane	Os01g0670100	S-Domain receptor like kinase-13	SDRLK-13	Ubiquitous expression, but highly expressed in root and shoot; up-regulated in response to drought in tolerant genotypes; up-regulated under submergence; regulated in response to Xanthomonas oryzae pv. oryzae and R. solani infection in susceptible genotypes.
LOC_Os01g48040	Os01g0670600	SD-2	GO:0048544 ( recognition of pollen, recognition or rejection of self pollen, self incompatibility); GO:0006468 (protein phosphorylation)	Protein kinase, catalytic domain domain containing protein.	2681	Os01t0670600-01	1 (2298)	0	A0A0P0V6F2	Os01g0670600 protein	765	(1 – 16) SP	(13 – 142) Bulb-type lectin	SLG		(316 – 394) Apple	426 – 451	(485 – 765) Protein kinase		plasma membrane	Os01g0670600	S-Domain receptor like kinase-14	SDRLK-14	Expresses in flower, leaf, root, & seed; up-regulated in response to submergence.
LOC_Os01g57480	Os01g0783800	SD-1	GO:0048544 ( recognition of pollen, recognition or rejection of self pollen, self incompatibility); GO:0006468 (protein phosphorylation)	Serine/threonine protein kinase-related domain containing protein.	6084	Os01t0783800-01	7 (1288;108;188;211;238;151;300)	6	Q5ZAV5	Os01g0783800 protein	827	(1-26) SP	(27-146) Bulb-type lectin	SLG		(343-415) Apple	435-458	(512 – 798) Protein kinase		plasma membrane	Os01g0783800	S-Domain receptor like kinase-SDS2	SDRLK-SDS2	Highly expressed across all tissues; plays a central role in programmed cell death induced by fungal pathogens; a positive regulator of rice innate immunity; provides resistance to Magnaporthe oryzae.
LOC_Os01g57510	Os01g0784200	SD-1	GO:0048544 ( recognition of pollen, recognition or rejection of self pollen, self incompatibility); GO:0006468 (protein phosphorylation)	Serine/threonine protein kinase-related domain containing protein.	4180	Os01t0784200-00	6 (1312;362;211;238;151;297)	4	Q8LQN6	Os01g0784200 protein	856	(1-28) SP	(29-155) Bulb-type lectin	SLG		(344-427) Apple	447-471	(542-820) Protein kinase		plasma membrane	Os01g0784200	S-Domain receptor like kinase-15	SDRLK-15	Low expression in microgametophyte cell only
LOC_Os01g65010	Os01g0870400	SD-2	GO:0048544 ( recognition of pollen, recognition or rejection of self pollen, self incompatibility); GO:0006468 (protein phosphorylation)	Similar to S-domain class receptor-like kinase3.	3257	Os01t0870400-00	2 (178;2297)	1	Q5N9Y5	Os01g0870400 protein	824	(1 – 29) SP	(29 – 153) Bulb-type lectin	SLG		(352 – 436) Apple	451 – 473	(501 – 790) Protein kinase		plasma membrane	Os01g0870400	S-Domain receptor like kinase-16	SDRLK-16	Leaf-specific expression.
LOC_Os01g66250	Os01g0885700	SD-2	GO:0048544 ( recognition of pollen, recognition or rejection of self pollen, self incompatibility); GO:0006468 (protein phosphorylation)	Protein kinase-like domain containing protein.	2771	Os01t0885700-01	1 (2481)	0	Q0JH38	Os01g0885700 protein	826	(1 – 29) SP	(33 – 152) Bulb-type lectin	SLG		(337 – 419) Apple	53 – 75 and 466 – 488	(526 – 821) Protein kinase		plasma membrane	Os01g0885700	S-Domain receptor like kinase-17	SDRLK-17	Flower- and leaf- specific expression; up-regulated in response to drought and chilling stress in tolerant rice genotypes.
LOC_Os01g66610	Os01g0889900	SD-2	GO:0048544 ( recognition of pollen, recognition or rejection of self pollen, self incompatibility); GO:0006468 (protein phosphorylation)	Serine/threonine protein kinase-related domain containing protein.	4381	Os01t0889900-01	2 (220;2261)	1	Q8LQH1	Os01g0889900 protein	826	(1 – 38) SP	(44 – 169) Bulb-type lectin	SLG		(368 – 457) Apple	470 – 493	(522 – 795) Protein kinase		plasma membrane	Os01g0889900	S-Domain receptor like kinase 18	SDRLK-18	Highly expressed across all tissues; up-regulated in response to B. glumae and R. solani in resistant rice genotypes; up-regulated under submergence; down-regulated in response to chilling stress.
LOC_Os01g66640	Os01g0890200	SD-2	GO:0048544 ( recognition of pollen, recognition or rejection of self pollen, self incompatibility); GO:0006468 (protein phosphorylation)	Similar to S-domain class receptor-like kinase3.	2773	Os01t0890200-00	2 (172;2195)	1	A0A0P0VBE8	Os01g0890200 protein	788	(1 – 26) SP	(27 – 153) Bulb-type lectin	SLG		(351 – 432) Apple	444 – 466	(494 – 766) Protein kinase		plasma membrane	Os01g0890200	S-Domain receptor like kinase-19	SDRLK-19	Flower-specific expression
LOC_Os03g35600	Os03g0556600	SD-1	GO:0048544 ( recognition of pollen, recognition or rejection of self pollen, self incompatibility); GO:0006468 (protein phosphorylation)	Serine/threonine protein kinase-related domain containing protein.	4251	Os03t0556600-01	6 (1291;413;211;238;151;303)	5	Q7Y1P1	D-mannose binding lectin family protein	868	(1-25) SP	(26-153) Bulb-type lectin	SLG		(344-426) Apple	447-467	(552-831) Protein kinase		plasma membrane	Os03g0556600	S-Domain receptor like kinase-20	SDRLK-20	High expression in seed but also expresses in leaf, root, shoot, and flower; up-regulated in response to chilling in tolerant rice genotype; up-regulated in response to Rice Stripe Virus; down-regulated in response to B. glumae in resistant genotype.
LOC_Os04g01310	Os04g0103500	SD-2	GO:0048544 ( recognition of pollen, recognition or rejection of self pollen, self incompatibility); GO:0006468 (protein phosphorylation)	Serine/threonine protein kinase-related domain containing protein.	2757	Os04t0103500-01	1 (2487)	0	Q7XMR2	OSJNBa0094O15.4 protein	828	(1 – 26) SP	(31 – 175) Bulb-type lectin	SLG		(371 – 457) Apple	472 – 497	(530 – 808) Protein kinase		plasma membrane	Os04g0103500	S-Domain receptor like kinase-21	SDRLK-21	High expression in flower but also expresses in leaf, shoot, root and seed; up-regulated in response to Rice Stripe Virus.
LOC_Os04g01320	Os04g0103700	SD-2	GO:0048544 ( recognition of pollen, recognition or rejection of self pollen, self incompatibility); GO:0006468 (protein phosphorylation)	Serine/threonine protein kinase-related domain containing protein.	2695	Os04t0103700-01	1 (2442)	0	Q7XXJ5	OSJNBa0094O15.5 protein	813	(1 – 22) SP	(24 – 161) Bulb-type lectin	SLG		(359 – 437) Apple	459 – 482	(515 – 800) Protein kinase		plasma membrane	Os04g0103700	S-Domain receptor like kinase-22	SDRLK-22	Ubiquitous expression, but high expression in root and flower; up-regulated in response to drought, submergence, and Xanthomonas oryzae pv. oryzae.
LOC_Os04g07200	Os04g0155500	SD-2	GO:0048544 ( recognition of pollen, recognition or rejection of self pollen, self incompatibility); GO:0006468 (protein phosphorylation)	Similar to H0525E10.2 protein.	2639	Os04t0155500-00	1 (2157)	0	A0A0P0W6Q5	Os04g0155500 protein	718	(1 – 17) SP	(88 – 224) Bulb-type lectin	SLG		(418 – 506) Apple	521 – 546	(577 – 718) Protein kinase		plasma membrane	Os04g0155500	S-Domain receptor like kinase-23	SDRLK-23	Up-regulated in response to B. glumae in susceptible rice genotype; not expressed under normal growth conditions.
LOC_Os04g23700	Os04g0303100	SD-2	GO:0048544 ( recognition of pollen, recognition or rejection of self pollen, self incompatibility); GO:0006468 (protein phosphorylation)	Similar to H0215E01.10 protein.	2508	Os04t0303100-00	1 (2508)	0	B9FEC3	Os04g0303100 protein	835	(1 – 27) SP	(47 – 177) Bulb-type lectin	SLG		(367 – 449) Apple	468 – 489	(524 – 807) Protein kinase		plasma membrane	Os04g0303100	S-Domain receptor like kinase-24	SDRLK-24	Highly expressed in carpel, pistil, and egg cells.
LOC_Os04g28780	Os04g0356600	SD-2	GO:0048544 ( recognition of pollen, recognition or rejection of self pollen, self incompatibility); GO:0006468 (protein phosphorylation)	Similar to OSIGBa0105P02.3 protein.	2573	Os04t0356600-01	1 (2439)	0	A0A0P0W9H2	Os04g0356600 protein	812	(1 – 18) SP	(20 – 161) Bulb-type lectin	SLG		(356 – 442) Apple	64 – 84 and 460 – 480	(514 – 788) Protein kinase		plasma membrane	Os04g0356600	S-Domain receptor like kinase-25	SDRLK-25	Low expression in leaf and root; up-regulated in response to Xanthomonas oryzae pv. oryzae.
LOC_Os04g34290	Os04g0420033	SD-2	GO:0048544 ( recognition of pollen, recognition or rejection of self pollen, self incompatibility); GO:0006468 (protein phosphorylation)	Similar to H0525E10.1 protein.	2544	Os04t0420033-00	1 (2493)	0	A0A0P0WAJ2	Os04g0420033 protein	830	(1 – 34) SP	(36 – 164) Bulb-type lectin	SLG		(358 – 446) Apple	460 – 483	(517 – 794) Protein kinase		plasma membrane	Os04g0420033	S-Domain receptor like kinase-26	SDRLK-26	Leaf-specific expression; down-regulated in response to drought in a tolerant genotype.
LOC_Os04g34330	Os04g0420600	SD-2	GO:0048544 ( recognition of pollen, recognition or rejection of self pollen, self incompatibility); GO:0006468 (protein phosphorylation)	Similar to H0525E10.2 protein.	2733	Os04t0420600-00	2 (2393;4)	1	Q7XMH4	OSJNBa0028I23.8 protein	798	(1 – 20) SP	(23 – 151) Bulb-type lectin	SLG		(345 – 432) Apple	446 – 467	(503 – 777) Protein kinase			Os04g0420600	S-Domain receptor like kinase-27	SDRLK-27	Highly expressed in pollen sperm, but show low level ubiquitous expression; down-regulated under submergence
LOC_Os04g34370	Os04g0420900	SD-2	GO:0048544 ( recognition of pollen, recognition or rejection of self pollen, self incompatibility); GO:0006468 (protein phosphorylation)	Similar to Receptor-like protein kinase.	2748	Os04t0420900-02	1 (1318)	0	Q7XMH0	OSJNBa0028I23.12 protein	805	(1 – 23) SP	(26 – 154) Bulb-type lectin	SLG		(345 – 433) Apple	447 – 469	(345 – 433) Protein kinase		plasma membrane	Os04g0420900	S-Domain receptor like kinase-28	SDRLK-28	High expression in pollen sperm, but also shows low ubiquitous expression; up-regulated in response to drought and chilling in tolerant genotypes; up-regulated in response to Rice Stripe Virus.
LOC_Os04g42740	Os04g0506700	SD-2	GO:0048544 ( recognition of pollen, recognition or rejection of self pollen, self incompatibility); GO:0006468 (protein phosphorylation)	Similar to OSIGBa0145C12.7 protein.	2401	Os04t0506700-00	1 (2382)	0	Q7XUM4	OSJNBb0002J11.8 protein	793	(1 – 22) SP	(22 – 158) Bulb-type lectin	SLG		(352 – 430) Apple	445 – 468	(498 – 770) Protein kinase		plasma membrane	Os04g0506700	S-Domain receptor like kinase-29	SDRLK-29	Root-specific expression.
LOC_Os04g54002	Os04g0632500	SD-1	GO:0048544 ( recognition of pollen, recognition or rejection of self pollen, self incompatibility); GO:0006468 (protein phosphorylation)	Protein kinase, catalytic domain domain containing protein.	3774	Os04t0632500-00	7 (1249;99;179;244;238;151;303)	6	Q0J9T3	Os04g0632500 protein	820	(1-18) SP	(19-140) Bulb-type lectin	SLG		(328-413) Apple	426 – 446	(493-781) Protein kinase			Os04g0632500	S-Domain receptor like kinase-30	SDRLK-30	High expression in tetrad-microspore cells, but low expression in leaf, shoot, root, flower and seed
LOC_Os04g54130	Os04g0633900	SD-1	GO:0048544 ( recognition of pollen, recognition or rejection of self pollen, self incompatibility); GO:0006468 (protein phosphorylation)	Similar to H0315F07.1 protein.	4080	Os04t0633900-00	7 (1324;141;161;217;226;133;303)	6	Q7XQT8	OSJNBa0043L09.9 protein	834	(1-18) SP	(28 – 154) Bulb-type lectin	SLG		(353 – 437) Apple	455-477	(526 – 806) Protein kinase		plasma membrane	Os04g0633900	S-Domain receptor like kinase-31	SDRLK-31	Flower- and root-specific expression.
LOC_Os04g54140	Os04g0634000	SD-1	GO:0048544 ( recognition of pollen, recognition or rejection of self pollen, self incompatibility); GO:0006468 (protein phosphorylation)	Serine/threonine protein kinase-related domain containing protein.	4141	Os04t0634000-01	7 (1318;123;125;217;241;133;315)	6	Q7XQT7	OSJNBa0043L09.10 protein	823	(1 – 27) SP	(33 – 154) Bulb-type lectin	SLG		(350 – 435) Apple	447 – 472	(506 – 790) Protein kinase		plasma membrane	Os04g0634000	S-Domain receptor like kinase-32	SDRLK-32	Expresses in leaf, shoot, root, and flower.
LOC_Os04g56090	Os04g0655000	SD-2	GO:0048544 ( recognition of pollen, recognition or rejection of self pollen, self incompatibility); GO:0006468 (protein phosphorylation)	Curculin-like (mannose-binding) lectin domain containing protein.	2487	Os04t0655000-00	1 (2448)	0	Q7XTD6	OSJNBa0071I13.4 protein	814	(1 – 25) SP	(22 – 151) Bulb-type lectin	SLG		(335 – 413) Apple	459 – 483	(519 – 814) Protein kinase			Os04g0655000	S-Domain receptor like kinase-33	SDRLK-33	Expresses in leaf, shoot, root, and flower.
LOC_Os05g07300	Os05g0165900	SD-2	GO:0048544 ( recognition of pollen, recognition or rejection of self pollen, self incompatibility); GO:0006468 (protein phosphorylation)	Serine/threonine protein kinase-related domain containing protein.	2825	Os05t0165900-01	1 (2445)	0	Q60D78	Os05g0165900 protein	814	(1 – 24) SP	(27 – 163) Bulb-type lectin	SLG		(358 – 441) Apple	456 – 478	(511 – 786) Protein kinase		plasma membrane	Os05g0165900	S-Domain receptor like kinase-34	SDRLK-34	High ubiquitous expression; upregulated in response to Xanthomonas oryzae pv. oryzae.
LOC_Os05g07420	Os05g0166300	SD-2	GO:0048544 ( recognition of pollen, recognition or rejection of self pollen, self incompatibility); GO:0006468 (protein phosphorylation)	Serine/threonine protein kinase-related domain containing protein.	2570	Os05t0166300-01	1 (2412)	0	Q60D69	Os05g0166300 protein	803	(1 – 25) SP	(28 – 165) Bulb-type lectin	SLG		(362 – 446) Apple	461 – 484	(511 – 790) Protein kinase		plasma membrane	Os05g0166300	S-Domain receptor like kinase-35	SDRLK-35	Expresses in flower, leaf, root, and shoot; down-regulated in response to drought; up-regulated under submergence; up-regulated in response to short-term cold stress in tolerant genotype Volano; down-regulated in response to long-term chilling stress in tolerant Li-Jiang-Xin-Tuan-He-Gu (LTH) genotype; up-regulated in response to Xanthomonas oryzae pv. oryzae.
LOC_Os05g07450	Os05g0166600	SD-2	GO:0048544 ( recognition of pollen, recognition or rejection of self pollen, self incompatibility); GO:0006468 (protein phosphorylation)	Serine/threonine protein kinase-related domain containing protein.	2415	Os05t0166600-00	1 (2415)	0	Q60D68	Os05g0166600 protein	804	(1 – 25) SP	(28 – 165) Bulb-type lectin	SLG		(362 – 446) Apple	461 – 484	(511 – 791) Protein kinase		plasma membrane	Os05g0166600	S-Domain receptor like kinase-36	SDRLK-36	High expression in tetrad-microspore cell but also expresses in leaf, shoot, root, and flower.
LOC_Os06g06960	Os06g0165500	SD-2	GO:0048544 ( recognition of pollen, recognition or rejection of self pollen, self incompatibility); GO:0006468 (protein phosphorylation)	Similar to OSIGBa0147J19.7 protein.	2569	Os06t0165500-00	1 (2448)	0	A0A0P0WSZ1	Os06g0165500 protein	815	(1 – 34) SP	(32 – 161) Bulb-type lectin	SLG		(355 – 431) Apple	471-496	(530 – 814) Protein kinase		plasma membrane	Os06g0165500	S-Domain receptor like kinase-37	SDRLK-37	Expresses in flower, leaf, root, and seed; down-regulated in response to drought in tolerant genotypes.
LOC_Os06g40030	Os06g0602500	SD-2	GO:0048544 ( recognition of pollen, recognition or rejection of self pollen, self incompatibility); GO:0006468 (protein phosphorylation)	Serine/threonine protein kinase-related domain containing protein.	2723	Os06t0602500-01	1 (2442)	0	Q69XK0	Os06g0602500 protein	813	(1 – 22) SP	(17 – 145) Bulb-type lectin	SLG		(329 – 409) Apple	456 – 480	(518 – 804) Protein kinase		plasma membrane	Os06g0602500	S-Domain receptor like kinase-38	SDRLK-38	High ubiquitous expression; up-regulated in response to drought, chilling and Xanthomonas oryzae pv. oryzae in tolerant rice genotypes; down-regulated under submergence.
LOC_Os07g08860	Os07g0186200	SD-2	GO:0048544 ( recognition of pollen, recognition or rejection of self pollen, self incompatibility); GO:0006468 (protein phosphorylation)	S-domain recepter-like kinase, Abiotic stress tolerance	2514	Os07t0186200-01	1 (2514)	0	Q7XI25	Os07g0186200 protein	837	(1 – 26) SP	(31 – 181) Bulb-type lectin	SLG		(379 – 466) Apple	239 – 258 and 483 – 506	(539 – 817) Protein kinase		plasma membrane	Os07g0186200	S-Domain receptor like kinase-SIK2	SDRLK-SIK2	plasma membrane-localized receptor-like kinase, with kinase activity in the presence of Mn(2+); high expression in leaf and root. Transgenic rice plants overexpressing OsSIK2 exhibit dwarfism, early leaf emergence at the seedling stage, and delay in dark-Induced leaf senescence. Also, involved in drought and salinity tolerance by modulating antioxidant capacity and eliminating H2O2.
LOC_Os07g36544	Os07g0550500	SD-1	GO:0048544 ( recognition of pollen, recognition or rejection of self pollen, self incompatibility); GO:0006468 (protein phosphorylation)	Hypothetical conserved gene.	4787	Os07t0550500-01	6 (1330;123;206;211;235;187)	5	A0A0P0X7Q1	Os07g0550500 protein	763	(1 – 30) SP	(31 – 163) Bulb-type lectin	SLG		(359 – 439) Apple	456 – 477	(537 – 763) Protein kinase		plasma membrane	Os07g0550500	S-Domain receptor like kinase-39	SDRLK-39	Ubiquitous expression but high expression in callus; down-regulated in response to R. solani
LOC_Os07g36570	Os07g0550900	SD-1	GO:0048544 ( recognition of pollen, recognition or rejection of self pollen, self incompatibility); GO:0006468 (protein phosphorylation)	Similar to Receptor-like protein kinase 6.	5419	Os07t0550900-01	8 (973;372;111;224;211;238;151;318)	7	Q7EZ33	Os07g0550900 protein	865	(1 – 28) SP	(29 – 154) Bulb-type lectin	SLG		(351 – 441) Apple	455 – 478	(544 – 822) Protein kinase		plasma membrane	Os07g0550900	S-Domain receptor like kinase-40	SDRLK-40	Preferential expression in flower and root; up-regulated in response to drought stress in tolerant genotypes; up-regulated in response to Rice Stripe Virus and B. glumae.
LOC_Os07g36780	Os07g0553633	SD-2	GO:0048544 ( recognition of pollen, recognition or rejection of self pollen, self incompatibility); GO:0006468 (protein phosphorylation)	Serine/threonine protein kinase-related domain containing protein.	2763	Os07t0553633-01	1 (2475)	0	Q6ZF83	Os07g0553633 protein	824	(1 – 18) SP	(19 – 149) Bulb-type lectin	SLG		(342 – 426) Apple	439 – 463	(495 – 767) Protein kinase		plasma membrane	Os07g0553633	S-Domain receptor like kinase-41	SDRLK-41	Low pistil-specific expression.
LOC_Os09g37880	Os09g0551400	SD-1	GO:0048544 ( recognition of pollen, recognition or rejection of self pollen, self incompatibility); GO:0006468 (protein phosphorylation)	Similar to S-locus receptor-like kinase RLK14.	3904	Os09t0551400-00	7 (1309;102;197;208;238;151;312)	6	A0A0P0XRC1	Os09g0551400 protein	838	(1 – 26) SP	(27 – 152) Bulb-type lectin	SLG		(345 – 430) Apple	447 – 467	(520 – 798) Protein kinase		plasma membrane	Os09g0551400	S-Domain receptor like kinase-42	SDRLK-42	Low seed-specific expression; up-regulated in response to B. glumae in the seedlings of a resistant genotype.
LOC_Os09g37890	Os09g0551500	SD-1	GO:0048544 ( recognition of pollen, recognition or rejection of self pollen, self incompatibility); GO:0006468 (protein phosphorylation)	Similar to S-locus receptor-like kinase RLK14.	3587	Os09t0551500-00	7 (1279;99;194;208;238;151;306)	6	A0A0P0XRC3	Os09g0551500 protein	824	(1 – 26) SP	(27 – 154) Bulb-type lectin	SLG		(336 – 422) Apple	437 – 456	(508 – 786) Protein kinase		plasma membrane	Os09g0551500	S-Domain receptor like kinase-43	SDRLK-43	Flower- and seed-specific expression.
LOC_Os10g01100	Os10g0101000	SD-2	GO:0048544 ( recognition of pollen, recognition or rejection of self pollen, self incompatibility); GO:0006468 (protein phosphorylation)	Serine/threonine protein kinase domain containing protein.	2810	Os10t0101000-01	1 (2442)	0	Q8W3C9	Os10g0101000 protein	813	(1 – 21) SP	(28 – 155) Bulb-type lectin	SLG		(307 – 403) Apple	443 – 465	(501 – 797) Protein kinase		plasma membrane	Os10g0101000	S-Domain receptor like kinase-44	SDRLK-44	Ubiquitous expression, but high expression in root and seed; up-regulated in response to chilling in a tolerant genotype; up-regulated under submergence; induced by Xanthomonas oryzae pv. oryzae.
LOC_Os10g20160	Os10g0342300	SD-2	GO:0048544 ( recognition of pollen, recognition or rejection of self pollen, self incompatibility); GO:0006468 (protein phosphorylation)	Serine/threonine protein kinase-related domain containing protein.	2530	Os10t0342300-01	1 (2424)	0	Q8LMB0	D-mannose binding lectin family protein	807	(1 – 20) SP	(22 – 151) Bulb-type lectin	SLG		(342 – 429) Apple	447 – 470	(503 – 778) Protein kinase		plasma membrane	Os10g0342300	S-Domain receptor like kinase-45	SDRLK-45	Ubiquitous expression but highly expresses in root and flower; up-regulated in response to Xanthomonas oryzae pv. oryzae.
SP + LLD + EGF + PAN-apple + TM + Kinase(4)
LOC_Os04g12540	Os04g0201900	SD-2	GO:0006952 (defense response); GO:0006468 (protein phosphorylation)	Similar to H0512B01.10 protein.	2472	Os04t0201900-00	1 (2442)	0	Q7FAZ3	G-type lectin S-receptor-like serine/threonine-protein kinase LECRK1	813	(1 – 19) SP	(22 – 149) Bulb-type lectin		293 – 346	(354 – 433) PAN	467 – 487	(523 – 797) Protein kinase		plasma membrane	Os04g0201900	S-Domain receptor like kinase-LecRK1	SDRLK-LecRK1	Ubiquitous expression but high expression in leaf; up-regulated in response to drought in a tolerant rice genotype; up-regulated in response to B. glumae; down-regulated in response to R. solani.
LOC_Os04g12560	Os04g0202300	SD-2	GO:0006952 (defense response); GO:0006468 (protein phosphorylation)	Similar to H0512B01.10 protein.	2436	Os04t0202300-00	2 (1784;283)	1	Q7FAZ2	G-type lectin S-receptor-like serine/threonine-protein kinase LECRK2	811	(1 – 23) SP	(24 – 153) Bulb-type lectin		292 – 344	(352 – 436) PAN	465 – 485	(521 – 795) Protein kinase		membrane	Os04g0202300	S-Domain receptor like kinase-LecRK2	SDRLK-LecRK2	Expresses in leaf, shoot, root, flower, and seed; down-regulated under submergence
LOC_Os04g12580	Os04g0202500	SD-2	GO:0006952 (defense response); GO:0006468 (protein phosphorylation)	Lectin receptor kinase 3, Brown planthopper (BPH) resistance	2468	Os04t0202500-00	1 (1464)	0	Q0JEU6	G-type lectin S-receptor-like serine/threonine-protein kinase LECRK3	811	(1 – 23) SP	(24 – 153) Bulb-type lectin		292 – 344	(352 – 430) PAN	465 – 485	(521 – 795) Protein kinase		membrane	Os04g0202500	S-Domain receptor like kinase-LecRK3	SDRLK-LecRK3	Flower- and root-specific expression.
LOC_Os04g12600	Os04g0202800	SD-2	GO:0006468 (protein phosphorylation)	Similar to H0512B01.12 protein.	2479	Os04t0202800-00	1 (2442)	0	Q7FAZ0	G-type lectin S-receptor-like serine/threonine-protein kinase LECRK4	804	(1 – 23) SP	(24 – 150) Bulb-type lectin		290 – 341	(349 – 426) PAN	459 – 479	(514 – 790) Protein kinase		membrane	Os04g0202800	S-Domain receptor like kinase-LecRK4	SDRLK-LecRK4	Expression in flower, seed, and shoot only.
SP + LLD + PAN-apple + TM + Kinase(2)
LOC_Os06g29810	Os06g0494100	SD-2	GO:0006468 (protein phosphorylation)	Serine/threonine protein kinase-related domain containing protein PID2	4488	Os06t0494100-01	1 (2538)	0	Q0DC23	Os06g0494100 protein	845	(33-53) SP	(61 – 182) Bulb-type lectin			(353 – 438) PAN	456 – 479	(521 – 802) Protein kinase		plasma membrane	Os06g0494100	S-Domain receptor like kinase-PID2	SDRLK-PID2	Expresses in leaves, roots, and stems; involved in programed cell death and confers a race‐specific resistance to M. grisea, the causal agent of blast disease in rice.
LOC_Os09g37800	Os09g0550600	SD-1	GO:0006468 (protein phosphorylation)	Similar to S-locus receptor-like kinase RLK14.	3286	Os09t0550600-00	7 (1330;93;200;211;238;151;303)	6	A0A0P0XQ04	Os09g0550600 protein	841	(1 – 24) SP	(25 – 161) Bulb-type lectin			(353 – 439) Apple	454 – 475	(525 – 811) Protein kinase		plasma membrane	Os09g0550600	S-Domain receptor like kinase-46	SDRLK-46	SDRLK-46 shows pollen sperm-specific expression.
LLD + SLG + PAN-apple + TM + Kinase (10)
LOC_Os01g12410	Os01g0223800	SD-2	GO:0048544 ( recognition of pollen, recognition or rejection of self pollen, self incompatibility); GO:0006468 (protein phosphorylation)	S-domain receptor-like kinase, Regulation of early crown root development, Drought resistance	4497	Os01t0223800-00	3 (145;72;2252)	2	A0A0P0UZX5	Os01g0223800 protein	822		(91 – 214) Bulb-type lectin	SLG		(384 – 462) Apple	469 – 494	(523 – 792) Protein kinase		plasma membrane	Os01g0223800	S-domain receptor-like kinase-ESG1	SDRLK-ESG1	Ubiquitous expression, but highly expressed in embryo; up-regulated during early crown root development; up-regulated in response to drought and is shown to provide drought tolerance. The OsESG1 kinase domain possessed auto-phosphorylation activity and phosphorylates MBP and His proteins. OsESG1 suppression causes a reduction in the number of crown roots and shoot length in early seedling stage.
LOC_Os01g12420	Os01g0223900	SD-2	GO:0048544 ( recognition of pollen, recognition or rejection of self pollen, self incompatibility); GO:0006468 (protein phosphorylation)	Serine/threonine protein kinase-related domain containing protein.	2637	Os01t0223900-01	1 (2442)	0	Q9LDT8	Os01g0223900 protein	813		(61 – 190) Bulb-type lectin	SLG		(360 – 441) Apple	36 – 58 and 454 – 476	(507 – 780) Protein kinase		plasma membrane	Os01g0223900	S-Domain receptor like kinase-47	SDRLK-47	Expresses in flower, root, seed, & shoot; down-regulated in response to chilling stress in tolerant genotype; up-regulated in response to B. glumae.
LOC_Os01g12430	Os01g0224000	SD-2	GO:0048544 ( recognition of pollen, recognition or rejection of self pollen, self incompatibility); GO:0006468 (protein phosphorylation)	Serine/threonine protein kinase-related domain containing protein.	2418	Os01t0224000-00	1 (2418)	0	Q5NAQ9	Os01g0224000 protein	805		(54 – 180) Bulb-type lectin	SLG		(349 – 430) Apple	443 – 465	(496 – 769) Protein kinase		plasma membrane	Os01g0224000	S-Domain receptor like kinase-48	SDRLK-48	High expression across all tissues; up-regulated in response to drought and chilling in tolerant genotypes.
LOC_Os01g40499	Os01g0587400	SD-2	GO:0048544 ( recognition of pollen, recognition or rejection of self pollen, self incompatibility); GO:0006468 (protein phosphorylation)	Serine/threonine protein kinase-related domain containing protein.	16038	Os01t0587400-01	1 (2304)	0	Q5ZBQ1	Os01g0587400 protein	767		(1 – 90) Bulb-type lectin	SLG		(287 – 375) Apple	394 – 417	(448 – 745) Protein kinase		plasma membrane	Os01g0587400	S-Domain receptor like kinase-49	SDRLK-49	High expression in carpel, pistil, and egg cell; up-regulated under submergence.
LOC_Os01g66680	Os01g0890600	SD-2	GO:0048544 ( recognition of pollen, recognition or rejection of self pollen, self incompatibility); GO:0006468 (protein phosphorylation)	Protein kinase, catalytic domain domain containing protein.	1998	Os01t0890600-00	1 (1845)	0	Q0JH14	Os01g0890600 protein	715		(36 – 161) Bulb-type lectin	SLG		(261 – 342) Apple	15 - 33 and 354 - 376	(406 – 674) Protein kinase			Os01g0890600	S-Domain receptor like kinase-50	SDRLK-50	Expression in flower, leaf, and shoot; down-regulated in response to chilling; up-regulated in response to R. solani in a susceptible rice genotype CCDR; down-regulated in response to Rice Stripe Virus;
LOC_Os04g34250	Os04g0419700	SD-2	GO:0048544 ( recognition of pollen, recognition or rejection of self pollen, self incompatibility); GO:0006468 (protein phosphorylation)	Similar to H0525E10.7 protein.	2483	Os04t0419700-00	1 (2424)	0	Q0JD96	Os04g0419700 protein	819		(36 – 166) Bulb-type lectin	SLG		(363 – 446) Apple	459 – 482	(518 – 794) Protein kinase			Os04g0419700	S-Domain receptor like kinase-51	SDRLK-51	Low leaf- and shoot-specific expression; down-regulated in response to submergence.
LOC_Os04g34270	Os04g0419900	SD-2	GO:0048544 ( recognition of pollen, recognition or rejection of self pollen, self incompatibility); GO:0006468 (protein phosphorylation)	Similar to H0525E10.7 protein.	2555	Os04t0419900-01	1 (2346)	0	Q0JD95	Os04g0419900 protein	781		(3 – 136) Bulb-type lectin	SLG		(333 – 414) Apple	426 – 451	(483 – 757) Protein kinase		plasma membrane	Os04g0419900	S-Domain receptor like kinase-52	SDRLK-52	Ubiquitous expression, but high expression in leaf; down-regulated in response to drought in tolerant genotype Nagina 22; up-regulated in response to chilling and submergence; up-regulated in Xanthomonas oryzae pv. oryzae.
LOC_Os04g54070	Os04g0633200	SD-1	GO:0048544 ( recognition of pollen, recognition or rejection of self pollen, self incompatibility); GO:0006468 (protein phosphorylation)	Similar to H0613A10.1 protein.	3837	Os04t0633200-00	7 (1261;105;179;211;238;148;303)	6	Q0J9S9	Os04g0633200 protein	887		(40-160) Bulb-type lectin	SLG		(355-440) Apple	445-475	(523-857) Protein kinase			Os04g0633200	S-Domain receptor like kinase-53	SDRLK-53	Expresses in leaf and flower; up-regulated in response to drought in Nonabokra genotype; up-regulated in response to B. glumae
LOC_Os04g54080	Os04g0633300	SD-1	GO:0048544 ( recognition of pollen, recognition or rejection of self pollen, self incompatibility); GO:0006468 (protein phosphorylation)	Similar to H0613A10.4 protein.	3093	Os04t0633300-00	6 (1267;368;211;238;148;303)	5	Q0J9S8	Os04g0633300 protein	832		(105-229) Bulb-type lectin	SLG		(416-502) Apple	41-61 and 82-100 and 512-534	(584-832) Protein kinase			Os04g0633300	S-Domain receptor like kinase-54	SDRLK-54	SDRLK-54 shows preferential expression in seed but expresses in all tissues; down-regulated in response to chilling stress in tolerant rice genotype
LOC_Os04g56080	Os04g0654800	SD-2	GO:0048544 ( recognition of pollen, recognition or rejection of self pollen, self incompatibility); GO:0006468 (protein phosphorylation)	Similar to OSIGBa0147J19.7 protein.	2679	Os04t0654800-00	1 (2679)	0	A0A0P0WFW5	Os04g0654800 protein	892		(66 – 195) Bulb-type lectin	SLG		(379 – 455) Apple	497 – 521	(557 – 847) Protein kinase		plasma membrane	Os04g0654800	S-Domain receptor like kinase-55	SDRLK-55	SDRLK-55 is not shown to express under normal growth condition; up-regulated in response to B. glumae in resistant rice genotype CL 161 at flowering stage only.
SP + LLD + SLG + EGF +TM+ Kinase (2)
LOC_Os08g13420	Os08g0230800	SD-2	GO:0048544 ( recognition of pollen, recognition or rejection of self pollen, self incompatibility); GO:0006468 (protein phosphorylation)	Hypothetical conserved gene.	2798	Os08t0230800-01	2(1272;120)	1	Q6ZCR4	Os08g0230800 protein	799	(1 – 22) SP	(29 – 147) Bulb-type lectin	SLG	290 – 328		444 – 467	(506 – 780) Protein kinase			Os08g0230800	S-Domain receptor like kinase-56	SDRLK-56	Ubiquitous expression, but high expression in leaf.
LOC_Os12g03650	Os12g0130300	SD-2	GO:0048544 ( recognition of pollen, recognition or rejection of self pollen, self incompatibility); GO:0006468 (protein phosphorylation)	Similar to Resistance protein candidate (Fragment).	2508	Os12t0130300-00	1 (2508)	0	Q2QY70	D-mannose binding lectin family protein	835	(1 – 27) SP	(28 – 159) Bulb-type lectin	SLG	295 – 331		480 – 506	(544 – 835) Protein kinase		plasma membrane	Os12g0130300	S-Domain receptor like kinase-57	SDRLK-57	Expresses in leaf, seed, and shoot; up-regulated in response to drought in tolerant genotype Nagina 22; down-regulated in response to Rice Stripe Virus.
LLD+SLG+EGF+TM+Kinase (1)
LOC_Os11g03840	Os11g0133100	SD-2	GO:0048544 ( recognition of pollen, recognition or rejection of self pollen, self incompatibility); GO:0006468 (protein phosphorylation)	Similar to D-mannose binding lectin family protein.	1998	Os11t0133100-00	1 (1998)	0	Q2RAY6	D-mannose binding lectin family protein	841		(28 – 158) Bulb-type lectin	SLG	295 – 331		486 – 512	(550 – 841) Protein kinase			Os11g0133100	S-Domain receptor like kinase-58	SDRLK-58	Expresses in flower, seed, and shoot; down-regulated in response to Rice Stripe Virus.
Truncated SD-RLKs (15)
SP + LLD + TM + Kinase (7)
LOC_Os02g52850	Os02g0767400	SD-2	GO:0006468 (protein phosphorylation)	Serine/threonine protein kinase-related domain containing protein.	3040	Os02t0767400-01	1 (2718)	0	Q6Z305	Os02g0767400 protein	905	(1 – 27) SP	(45 – 158) Bulb-type lectin				448 – 473	(535 – 840) Protein kinase		plasma membrane	Os02g0767400	S-Domain receptor like kinase-59	SDRLK-59	Contains partial S-domain; shows flower and root-specific expression; up-regulated in response to submergence.
LOC_Os03g61310	Os03g0828800	SD-2	GO:0006468 (protein phosphorylation)	Serine/threonine protein kinase-related domain containing protein.	3164	Os03t0828800-01	1 (2394)	0	Q10B65	D-mannose binding lectin family protein, expressed	797	(1 – 21) SP	(28 – 150) Bulb-type lectin				448 – 471	(513 – 797) Protein kinase		plasma membrane	Os03g0828800	S-Domain receptor like kinase-60	SDRLK-60	Contains partial S-domain; expresses in flower, leaf, seed, and shoot.
LOC_Os04g39910	Os04g0475100	SD-2	GO:0006468 (protein phosphorylation)	Similar to OSIGBa0106G07.2 protein.	2385	Os04t0475100-00	1 (2385)	0	Q7XKV1	OSJNBa0022H21.6 protein	794	(1 – 22) SP	(27 – 146) Bulb-type lectin				46 – 65 and 450 – 480	(513 – 778) Protein kinase		plasma membrane	Os04g0475100	S-Domain receptor like kinase-61	SDRLK-61	This gene encodes a partial S-domain; not expressed
LOC_Os04g39930	Os04g0475200	SD-2	GO:0006468 (protein phosphorylation)	Similar to OSIGBa0106G07.3 protein.	2449	Os04t0475200-00	1 (2406)	0	Q7XKV0	OSJNBa0022H21.7 protein	801	(1 – 20) SP	(26 – 146) Bulb-type lectin				449 – 473	(511 – 785) Protein kinase		plasma membrane	Os04g0475200	S-Domain receptor like kinase-62	SDRLK-62	Contains partial S-domain; expresses in flower, leaf, seed, and shoot; down-regulated in response to B. glumae in resistant genotype
LOC_Os06g41510	Os06g0619600	SD-2	GO:0006468 (protein phosphorylation)	Hypothetical conserved gene.	2496	Os06t0619600-00	1 (2496)	0	Q69XP2	Os06g0619600 protein	831	(1 – 29) SP	(31 – 168) Bulb-type lectin				465 – 488	(516 – 808) Protein kinase		plasma membrane	Os06g0619600	S-Domain receptor like kinase-63	SDRLK-63	This gene encodes partial S-domain; not expressed
LOC_Os06g41560	Os06g0620200	SD-2	GO:0006468 (protein phosphorylation)	Protein kinase, catalytic domain domain containing protein.	2758	Os06t0620200-01	1 (2556)	0	A0A0P0WZ81	Os06g0620200 protein	851	(1 – 21) SP	(21 – 150) Bulb-type lectin				463 – 484	(513 – 810) Protein kinase		plasma membrane	Os06g0620200	S-Domain receptor like kinase-64	SDRLK-64	Contains partial S-domain; low expression in flower and seeds.
LOC_Os09g28180	Os09g0454900	SD-2	GO:0006468 (protein phosphorylation)	Serine/threonine protein kinase-related domain containing protein	3114	Os09t0454900-01	1 (2697)	0	Q67U98	Os09g0454900 protein	898	(1 – 27) SP	(38 – 156) Bulb-type lectin				451 – 471	(539 – 856) Protein kinase		plasma membrane	Os09g0454900	S-Domain receptor like kinase-65	SDRLK-65	Contains partial S-domain; expresses in flower, root, & seed; up-regulated in response to drought; up-regulated in response to submergence and is direct target of SUB1A and ERF66 transcription factors; up-regulated in response to Xanthomonas oryzae pv. oryzae and Rice Stripe Virus.
LLD + SLG + TM + Kinase(1)
LOC_Os06g06930	Os06g0164900	SD-2	GO:0048544 ( recognition of pollen, recognition or rejection of self pollen, self incompatibility); GO:0006468 (protein phosphorylation)	Similar to OSIGBa0147J19.7 protein.	9643	Os06t0164900-00	2 (790;1727)	1	A0A0N7KLL1	Os06g0164900 protein	838		(47 – 176) Bulb-type lectin	SLG			495 – 520	(554 – 837) Protein kinase		plasma membrane	Os06g0164900	S-Domain receptor like kinase-66	SDRLK-66	Contains partial S-domain; high expression in carpel, pistil, and egg cell; up-regulated in response to chilling and submergence
LLD + PAN-apple + TM + Kinase (1)
LOC_Os01g12290	Os01g0222800	SD-2	GO:0006468 (protein phosphorylation)	Similar to OSIGBa0145C12.7 protein.	1078	Os01t0222800-00	2 (226;254)	0	Q5NB61	Os01g0222800 protein	775		(36 – 161) Bulb-type lectin			(329 – 411) Apple	422 – 444	(475 – 747) Protein kinase			Os01g0222800	S-Domain receptor like kinase-67	SDRLK-67	Contains partial S-domain; expressed in flower, root, seed, and shoot; up-regulated in response to drought and B. glumae infection in resistant genotypes
PAN-apple + TM + Kinase (1)
LOC_Os01g12400	Os01g0223700	SD-2	GO:0006468 (protein phosphorylation)	Bulb-type lectin domain domain containing protein.	2655	Os01t0223700-01	1 (831)	0	Q0JPG7	Os01g0223700 protein	502					(63 – 141) Apple	4 -26 and 148 - 170	(203 – 472) Protein kinase			Os01g0223700	S-Domain receptor like kinase-68	SDRLK-68	Contains partial S-domain; high ubiquitous expression; down-regulated in response to drought in tolerant rice genotypes
SLG + TM + Kinase (2)
LOC_Os05g34390	Os05g0416701	SD-2	GO:0048544 ( recognition of pollen, recognition or rejection of self pollen, self incompatibility); GO:0006468 (protein phosphorylation)	No annotation or description available	1647	Os05t0416701-00	3 (341;98;983)	2	A0A0N7KKS6	Os05g0416701 protein	473			SLG			173 – 197	(227 – 473) Protein kinase			Os05g0416701	S-Domain receptor like kinase-69	SDRLK-69	This gene encodes partial S-domain containing RLK; not expressed
LOC_Os01g66630	Os01g0890100	SD-2	GO:0006468 (protein phosphorylation)	Similar to OSIGBa0148I18.4 protein.	1611	Os01t0890100-00	4	3	A0A0P0VBG6	Os01g0890100 protein	537			(68-180) SLG				(247 – 520) Protein kinase		nucleus	Os01g0890100	S-Domain receptor like kinase-PSRK2	SDRLK-PSRK2	Contains partial S-domain; expresses at reproductive growth stage in flowers and nodes; induced by GA3; controls stem elongation by negatively regulating GA responses.
SLG + PAN-apple + TM + Kinase (3)
LOC_Os01g65060	Os01g0871000	SD-2	GO:0048544 ( recognition of pollen, recognition or rejection of self pollen, self incompatibility); GO:0006468 (protein phosphorylation)	Similar to S-domain class receptor-like kinase3.	2042	Os01t0871000-00	1 (1791)	0	A0A0P0VAV4	Os01g0871000 protein	596			SLG		(136 – 221) Apple	236 – 258	(286 – 566) Protein kinase		nucleus	Os01g0871000	S-Domain receptor like kinase-70	SDRLK-70	This gene encodes partial S-domain containing protein; not expressed under normal growth conditions; up-regulated in response to X. oryzae.
LOC_Os04g54010	Os04g0632600	SD-1	GO:0048544 ( recognition of pollen, recognition or rejection of self pollen, self incompatibility); GO:0006468 (protein phosphorylation)	Bulb-type lectin domain domain containing protein.	3166	Os04t0632600-00	1 (315)	0	Q0J9T2	OSJNBb0015D13.19 protein	718			SLG		(226-311) Apple	326-347	(402-680) Protein kinase			Os04g0632600	S-Domain receptor like kinase-71	SDRLK-71	Contains partial S-domain; expresses in flower, leaf, root, and seed; up-regulated in response to drought and chilling stress in tolerant rice genotypes; up-regulated in response to Xanthomonas oryzae pv. oryzae in resistant genotype.
LOC_Os06g37670	Os06g0574550	SD-2	GO:0048544 ( recognition of pollen, recognition or rejection of self pollen, self incompatibility); GO:0006468 (protein phosphorylation)	Protein kinase, catalytic domain domain containing protein.	2016	Os06t0574550-01	1 (1752)	0	A0A0P0WXZ2	Os06g0574550 protein	583			SLG		(84 – 164) Apple	212 – 236	(273 – 558) Protein kinase		plasma membrane	Os06g0574550	S-Domain receptor like kinase-72	SDRLK-72	This gene encodes a protein containing a partial S-domain; not expressed
SD-Receptor-like protein (RLP) without Kinase domain (12)
SP+LLD+SLG (2)
LOC_Os08g08140	Os08g0179150	SD-1	GO:0048544 ( recognition of pollen, recognition or rejection of self pollen, self incompatibility)	Hypothetical conserved gene.	952	Os08t0179150-01	1 (927)	0	A0A0N7KPD3	Os08g0179150 protein	309	(1 – 27) SP	(28 – 161) Bulb-type lectin	IPR000858 S_locus_glycoprot_dom						extracellular	Os08g0179150	S-Domain receptor like protein-1	SDRLP-1	Flower-specific expression.
LOC_Os09g37840	Os09g0551150	SD-1	GO:0048544 ( recognition of pollen, recognition or rejection of self pollen, self incompatibility)	No annotation or description available	1077	Os09t0551150-00	1 (1077)	0	A0A0P0XQ91	Os09g0551150 protein	358	(1 – 24) SP	(25-153) Bulb-type lectin	IPR000858 S_locus_glycoprot_dom							Os09g0551150	S-Domain receptor like protein-2	SDRLP-2	Expresses in response to oxidative stress only.
SP+LLD+SLG+PAN_Apple (2)
LOC_Os05g07080	Os05g0163500	SD-1	GO:0048544 ( recognition of pollen, recognition or rejection of self pollen, self incompatibility)		2390	Os05t0163500-00	2 (1,750; 572)	1	A0A0P0WIA4	Os05g0163500 protein	420	(1-22) SP	(24 – 157) Bulb-type lectin	IPR000858 S_locus_glycoprot_dom		(351 – 420) Apple				plasma membrane	Os05g0163500	S-Domain receptor like protein-3	SDRLP-3	Ubiquitous expression, but high expression in seed
LOC_Os01g45520	Os01g0642700	SD-2	GO:0048544 ( recognition of pollen, recognition or rejection of self pollen, self incompatibility)	S-locus glycoprotein domain containing protein.	2754	Os01t0642700-00	2 (154;1148)	1	A0A0N7KDE3	Os01g0642700 protein	433	(1 – 21) SP	(22 – 151) Bulb-type lectin	IPR000858 S_locus_glycoprot_dom		(338 – 427) Apple				plasma membrane	Os01g0642700	S-Domain receptor like protein-4	SDRLP-4	Expression in flower, seed, and shoot
SP+LLD+SLG+EGF+TM (1)
LOC_Os08g13870	Os08g0236400	SD-2	GO:0048544 ( recognition of pollen, recognition or rejection of self pollen, self incompatibility)	Epidermal growth factor-like, type 3 domain containing protein.	1492	Os08t0236400-00	2 (1409;37)	1	A0A0P0XDV7	Os08g0236400 protein	481	(1 – 22) SP	(29 – 147) Bulb-type lectin	SLG	290 – 328		439 – 463			plasma membrane	Os08g0236400	S-Domain receptor like protein-5	SDRLP-5	Leaf-specific low expression.
LLD+SLG+EGF+TM (1)
LOC_Os12g03670	Os12g0130500	SD-2	GO:0048544 ( recognition of pollen, recognition or rejection of self pollen, self incompatibility)	Similar to D-mannose binding lectin family protein.	2611	Os12t0130500-00	2 (1567;26)	1	A0A0P0Y700	Os12g0130500 protein	530		(1 – 127) Bulb-type lectin	SLG	260 – 296		447 – 473			plasma membrane	Os12g0130500	S-Domain receptor like protein-6	SDRLP-6	High expression in root, but low level ubiquitous expression; up-regulated in response to submergence
SP+LLD+SLG+PAN+TM (1)
LOC_Os09g37780	Os09g0550300	SD-1	GO:0048544 ( recognition of pollen, recognition or rejection of self pollen, self incompatibility); GO:0006468 (protein phosphorylation)	S-locus glycoprotein domain containing protein.	3603	Os09t0550300-00	5 (1351;102;200;168;315)	4	A0A0P0XPZ9	Os09g0550300 protein	711	(1 – 27) SP	(29 – 170) Bulb-type lectin	SLG		(363 – 448) Apple	461 – 480			plasma membrane	Os09g0550300	S-Domain receptor like protein-7	SDRLP-7	Root-specific expression.
LLD+EGF+PAN+TM (1)
LOC_Os03g30890	Os03g0422800	SD-2	GO:0048544 ( recognition of pollen, recognition or rejection of self pollen, self incompatibility); GO:0006468 (protein phosphorylation)	Similar to D-mannose binding lectin family protein, expressed.	4241	Os03t0422800-01	2 (21;2391)	1	A0A0N7KHG5	Os03g0422800 protein	803		(1 – 115) Bulb-type lectin		247 – 282	(297 – 379) Apple	428 – 453			plasma membrane	Os03g0422800	S-Domain receptor like protein-8	SDRLP-8	High expression in flower, but ubiquitous expression; down-regulated in response to drought; up-regulated in response chilling in tolerant genotypes.
SLG+PAN+TM (1)
LOC_Os05g07470	Os05g0166900	SD-2	GO:0048544 ( recognition of pollen, recognition or rejection of self pollen, self incompatibility)	Similar to S-domain receptor-like protein kinase.	1598	Os05t0166900-00	1 (873)	0	A0A0P0WIC4	Os05g0166900 protein	290			SLG		(119 – 202) Apple	218 – 241			plasma membrane	Os05g0166900	S-Domain receptor like protein-9	SDRLP-9	Root-specific expression; up-regulated in response to submergence.
SP+LLD+TM (1)
LOC_Os06g41500	Os06g0619200	SD-2	unknown	No annotation or description available	1605	Os06t0619200-00	1 (1605)	0	A0A0P0WYP8	Os06g0619200 protein	534	(1 – 31) SP	(33 – 164) Bulb-type lectin				460 – 481				Os06g0619200	S-Domain receptor like protein-10	SDRLP-10	This gene encodes partial S-domain; not expressed
LLD (1)
LOC_Os01g57490	Os01g0783900	SD-1	unknown	No annotation or description available	1427	Os01t0783900-00	4 (776;169;63;18)	3	A0A0P0V905	Os01g0783900 protein	341		(36-156) Bulb-type lectin								Os01g0783900	S-Domain receptor like protein-11	SDRLP-11	Pollen sperm-specific expression
LLD+SLG+PAN+TM (1)
LOC_Os12g07800	Os12g0177800	SD-2	GO:0048544 ( recognition of pollen, recognition or rejection of self pollen, self incompatibility)	Similar to D-mannose binding lectin family protein, expressed.	5052	Os12t0177800-01	3 (28;1457;60)	2	A0A0P0Y7N1	Os12g0177800 protein	514		(14 – 135) Bulb-type lectin	SLG		(316 – 390) Apple	437 – 461			plastid	Os12g0177800	S-Domain receptor like protein-12	SDRLP-12	High expression in flower, but ubiquitous expression.
SD-Kinases lacking TM (14)
SD Kinase lacking TM (17)
SP + LLD + SLG + EGF + PAN-apple + Kinase (3)
LOC_Os09g37840	Os09g0551201	SD-1	GO:0048544 ( recognition of pollen, recognition or rejection of self pollen, self incompatibility); GO:0006468 (protein phosphorylation)	Serine/threonine protein kinase-related domain containing protein.	8344	Os09t0551201-00	4 (1306;194;208;239)	3	A0A0N7KR84	Os09g0551201 protein	648	(1 – 25) SP	(26-154) Bulb-type lectin	SLG	288-328	(347-431) Apple		(484-648) Protein kinase		plasma membrane	Os09g0551201	S-Domain kinase-1	SDK1	Not expressed under normal growth condition; up-regulated in response to cadmium stress, and in response to B. glumae infection.
LOC_Os11g03880	Os11g0133500	SD-2	GO:0048544 ( recognition of pollen, recognition or rejection of self pollen, self incompatibility); GO:0006468 (protein phosphorylation)	Protein kinase-like domain containing protein.	2613	Os11t0133500-00	1 (2490)	0	Q2RAY2	D-mannose binding lectin family protein	828	(1 – 19) SP	(25 – 158) Bulb-type lectin	SLG	290 – 326	(340 – 416) Apple		(542 – 824) Protein kinase			Os11g0133500	S-Domain kinase-2	SDK2	Root-specific expression
LOC_Os12g03690	Os12g0130800	SD-2	GO:0048544 ( recognition of pollen, recognition or rejection of self pollen, self incompatibility); GO:0006468 (protein phosphorylation)		2567	Os12t0130800-00	1 (2490)	0	A0A0P0Y6H8	Os12g0130800 protein	829	(1 – 21) SP	(26 – 159) Bulb-type lectin	SLG	291 – 327	(341 – 417) Apple		(543 – 825) Protein kinase		plasma membrane	Os12g0130800	S-Domain kinase-3	SDK3	Not expressed under normal growth conditions; up-regulated in response to drought in a tolerant rice genotype
SP + LLD + SLG + PAN-apple + Kinase(9)
LOC_Os01g48020	Os01g0670300	SD-2	GO:0048544 ( recognition of pollen, recognition or rejection of self pollen, self incompatibility); GO:0006468 (protein phosphorylation)	Similar to OSIGBa0135L04.3 protein.	2337	Os01t0670300-00	1 (2337)	0	A2ZWE1	Os01g0670300 protein	778	(1 – 21) SP	(18 – 147) Bulb-type lectin	SLG		(313 – 403) Apple		(490 – 774) Protein kinase		plasma membrane	Os01g0670300	S-Domain kinase-4	SDK4	Expresses in seedlings.
LOC_Os04g15580	Os04g0226600	SD-1	GO:0048544 ( recognition of pollen, recognition or rejection of self pollen, self incompatibility); GO:0006468 (protein phosphorylation)	Similar to H0105C05.10 protein.	3304	Os04t0226600-01	1 (1188)	0	Q0JEP1	Os04g0226600 protein	833	(1-20) SP	(21-154) Bulb-type lectin	SLG		(335-433) Apple		(515-793) Protein kinase			Os04g0226600	S-Domain kinase-5	SDK5	Flower- and leaf-specific expression; up-regulated in resistant rice genotype IRBB21 in response to Xanthomonas oryzae pv. oryzae.
LOC_Os04g53994	Os04g0631800	SD-1	GO:0048544 ( recognition of pollen, recognition or rejection of self pollen, self incompatibility); GO:0006468 (protein phosphorylation)	S-locus receptor-like kinase RLK13.	3782	Os04t0631800-00	7 (1270;102;182;211;238;151;303)	6	Q0J9T9	Os04g0631800 protein	813	(1-20) SP	(21-146) Bulb-type lectin	SLG		(331-416) Apple		(497-783) Protein kinase			Os04g0631800	S-Domain kinase-6	SDK6	High expression in all tissues; up-regulated in response to drought in tolerant genotype; up-regulated in response to Xanthomonas oryzae pv. oryzae; down-regulated in response to R. solani.
LOC_Os04g53998	Os04g0632100	SD-1	GO:0048544 ( recognition of pollen, recognition or rejection of self pollen, self incompatibility); GO:0006468 (protein phosphorylation)	Similar to H0613A10.1 protein.	3323	Os04t0632100-01	7 (1255;102;182;211;238;151;303)	6	Q0J9T7	Os04g0632100 protein	813	(1-19) SP	(21-147) Bulb-type lectin	SLG		(335-415) Apple		(497-775) Protein kinase		plasma membrane	Os04g0632100	S-Domain kinase-7	SDK7	Expresses in flower, leaf, seed, and shoot; up-regulated in response to drought stress in tolerant rice genotypes.
LOC_Os04g54020	Os04g0632901	SD-1	GO:0048544 ( recognition of pollen, recognition or rejection of self pollen, self incompatibility); GO:0006468 (protein phosphorylation)	Protein kinase, catalytic domain domain containing protein.	2736	Os04t0632901-00	4 (1309;194;211;239)	3	A0A0P0WF90	Os04g0632901 protein	650	(1-28) SP	(32-152) Bulb-type lectin	SLG		(351-432) Apple		(485-650) Protein kinase		plasma membrane	Os04g0632901	S-Domain kinase-8	SDK8	Flower- and leaf-specific expression; down-regulated in response to R. solani in resistant rice genotype MCR; Down-regulated in response to drought stress during early phase, but up-regulated during late phase.
LOC_Os04g54120	Os04g0633800	SD-1	GO:0048544 ( recognition of pollen, recognition or rejection of self pollen, self incompatibility); GO:0006468 (protein phosphorylation)	Similar to H0315F07.5 protein.	3296	Os04t0633800-00	7 (1261;117;182;211;238;151;303)	6	Q7XQT9	OSJNBa0043L09.8 protein	822	(1-20) SP	(21 – 146) Bulb-type lectin	SLG		(334 – 419) Apple		(506 – 799) Protein kinase			Os04g0633800	S-Domain kinase-9	SDK9	Pollen sperm-specific expression.
LOC_Os04g54180	Os04g0634400	SD-1	GO:0048544 ( recognition of pollen, recognition or rejection of self pollen, self incompatibility); GO:0006468 (protein phosphorylation)	Similar to H0105C05.10 protein.	3485	Os04t0634400-00	6 (1342;125;217;232;133;297)	5	Q0J9S4	Os04g0634400 protein	781	(1 – 26) SP	(33 – 155) Bulb-type lectin	SLG		(358 – 443) Apple		(473 – 758) Protein kinase			Os04g0634400	S-Domain kinase-10	SDK10	Flower- and root-specific expression; down-regulated in response to drought in tolerant rice genotypes.
LOC_Os09g37840	Os09g0551251	SD-1	GO:0048544 ( recognition of pollen, recognition or rejection of self pollen, self incompatibility); GO:0006468 (protein phosphorylation)	Similar to D-mannose binding lectin family protein.	4115	Os09t0551251-00	7 (1309;170;208;238;151;305;43)	6	A0A0P0XQ32	Os09g0551251 protein	807	(1 – 23) SP	(24-152) Bulb-type lectin	SLG		(346-430) Apple		(477-756) Protein kinase		plasma membrane	Os09g0551251	S-Domain kinase-11	SDK11	Root-specific expression.
LOC_Os11g10280	Os11g0208700	SD-2	GO:0048544 ( recognition of pollen, recognition or rejection of self pollen, self incompatibility); GO:0006468 (protein phosphorylation)		2468	Os11t0208700-00	1 (1716)	0	Q0ITY0	Os11g0208700 protein	685	(1 – 24) SP	(26 – 171) Bulb-type lectin	SLG		(377 – 460) Apple		(384 – 685) Protein kinase		mitochondrion	Os11g0208700	S-Domain kinase-12	SDK12	Expresses in leaf, shoot, root, flower, and seed.
LLD + SLG + Kinase (1)
LOC_Os03g62180	Os03g0838100	SD-2	GO:0048544 ( recognition of pollen, recognition or rejection of self pollen, self incompatibility); GO:0006468 (protein phosphorylation)		3329	Os03t0838100-01	1 (2577)	0	Q851M7	Lectin protein kinase family protein, putative, expressed	858	(1 – 27) SP	(28 – 146) Bulb-type lectin	SLG				(495 – 771) Protein kinase		plasma membrane	Os03g0838100	S-Domain kinase-13	SDK13	High expression in all tissues; up-regulated in response to Xanthomonas oryzae pv. oryzae in resistant rice genotype.
LLD + SLG + PAN-apple + Kinase (1)
LOC_Os04g54110	Os04g0633600	SD-1	GO:0048544 ( recognition of pollen, recognition or rejection of self pollen, self incompatibility); GO:0006468 (protein phosphorylation)		3078	Os04t0633600-00	5 (1171;74;211;227;303)	4	A0A0N7KJS0	Os04g0633600 protein	661		(1 – 115) Bulb-type lectin	SLG		(302 – 387) Apple		(399 – 661) Protein kinase		plasma membrane	Os04g0633600	S-Domain kinase-14	SDK14	Ubiquitous expression but highly expressed in flower and leaf; up-regulated in response to drought in tolerant genotype.
Kinases (total 26)
TM+Kinase (12)
LOC_Os01g02310	Os01g0113350	SD-2	GO:0006468 (protein phosphorylation)	Protein kinase, catalytic domain domain containing protein.	2205	Os01t0113350-00	1 (1959)	0	Q656X4	Os01g0113350 protein	652	(1 – 30) SP					272 – 295	(336 – 625) Protein kinase		plasma membrane	Os01g0113350	Membrane-associated kinase-1	MAK1	High expression in leaf, but ubiquitous expression; up-regulated in response to bacterial pathogen B. glumae.
LOC_Os01g46030	Os01g0648600	SD-2	GO:0006468 (protein phosphorylation)	Similar to receptor-like serine-threonine protein kinase.	1521	Os01t0648600-00	1 (1521)	0	A2ZW00	Os01g0648600 protein	506						31 – 49 and 55 – 74 and 86 – 103 and 109 – 128	(194 – 491) Protein kinase		plasma membrane	Os01g0648600	Membrane-associated kinase-2	MAK2	Expresses in flower, root, seed, and shoot; down-regulated in response to drought in rice cultivar Nonabokra.
LOC_Os02g27310	Os02g0472700	SD-1	GO:0006468 (protein phosphorylation), and GO:0006952 (defense response)	Similar to Receptor protein kinase.	2395	Os02t0472700-00	5 (135;211;238;151;309)	4	C7IYN2	Os02g0472700 protein	693	(1-24) SP					361-384	(365-626) Protein kinase		extracellular or secreted	Os02g0472700	Membrane-associated kinase-3	MAK3	Expresses in flower, leaf, root, and seed; up-regulated in response to R. solani in resistant rice genotype
LOC_Os02g48080	Os02g0710500	SD-1	GO:0006468 (protein phosphorylation)	Similar to Avr9/Cf-9 rapidly elicited protein 11 (Fragment).	2573	Os02t0710500-01	7 (97;108;146;21;;238;151;330)	6	Q6ZFY2	Os02g0710500 protein	426						42-62	(101-388) Protein kinase		plasma membrane	Os02g0710500	Extracellular kinase-1	ECK1	High expression in roots, but also expresses in all tissues; down-regulated in response to drought in tolerant genotype; up-regulated under submergence; up-regulated in response to Rice Stripe Virus and R. solani
LOC_Os06g05070	Os06g0142650	SD-2	GO:0006468 (protein phosphorylation)	Protein kinase, core domain containing protein.	1386	Os06t0142650-00	1 (1386)	0	Q5VSC0	Os06g0142650 protein	461						7 – 28 and 34 – 54	(106 – 403) Protein kinase		plasma membrane	Os06g0142650	Membrane-associated kinase-4	MAK4	Expresses in seedlings; down-regulated in response to chilling stress.
LOC_Os06g13320	Os06g0241100	SD-2	GO:0006468 (protein phosphorylation)	Similar to S-locus receptor kinase precursor.	1834	Os06t0241100-01	2 (85;1250)	1	Q67VH6	Os06g0241100 protein	444						20 – 46	(108 – 400) Protein kinase		plasma membrane	Os06g0241100	Membrane-associated kinase-5	MAK5	Expresses in flower, leaf, & seed; up-regulated in response to drought stress in tolerant genotype; up-regulated in response to submergence in Indica cultivar Huanghuazhan but down-regulated in Japonica cultivar Taikeng 9.
LOC_Os06g30130	Os06g0496800	SD-1	GO:0006468 (protein phosphorylation)	Bulb-type lectin domain domain containing protein.	2902	Os06t0496800-01	7 (112;114;146;214;238;151;330) 7 (112;114;146;214;238;151;330)	6 6	Q654J4	Os06g0496800 protein	434						49 – 69	(108 – 387) Protein kinase		plasma membrane	Os06g0496800	Membrane-associated kinase-6	MAK6	High ubiquitous expression; down-regulated in response to submergence.
LOC_Os06g35850	Os06g0551800	SD-2	GO:0006468 (protein phosphorylation)	Similar to D-mannose binding lectin family protein.	2881	Os06t0551800-01	1 (705)	0	Q5Z936	Os06g0551800 protein	517						171 – 190 and 220 – 242	(276 – 517) Protein kinase			Os06g0551800	Membrane-associated kinase-7	MAK7	Expresses in flower, leaf, seed, and shoot
LOC_Os06g37690	Os06g0575000	SD-2	GO:0006468 (protein phosphorylation), GO:0042742 (defense response to bacterium) and GO:0002229 (defense response to oomycetes)	Protein kinase, core domain containing protein.	1227	Os06t0575000-00	1 (1227)	0	A0A0P0WY30	Os06g0575000 protein	408						57 – 81	(116 – 401) Protein kinase		plasma membrane	Os06g0575000	Membrane-associated kinase-8	MAK8	High expression in carpel, pistil, and egg cell; up-regulated in response to submergence in Indica cultivar Huanghuazhan seedlings but down-regulated in Japonica cultivar Taikeng 9
LOC_Os07g04810	Os07g0141100	SD-2	GO:0006468 (protein phosphorylation)	Protein kinase, catalytic domain domain containing protein.	1583	Os07t0141100-01	2 (61;1283)	1	Q7XIP7	Os07g0141100 protein	447						12 – 36	(97 – 407) Protein kinase		plasma membrane	Os07g0141100	Membrane-associated kinase-9	MAK9	Seed- and callus-specific expression; up-regulated in response to submergence in Indica cultivar Huanghuazhan seedlings but down-regulated in Japonica cultivar Taikeng 9.
LOC_Os08g08140	Os08g0179000	SD-1	GO:0006468 (protein phosphorylation)	Protein kinase-like domain containing protein.	8336	Os08t0179000-01	7 (61;99;182;211;238;154;294)	6	A0A0P0XCI7	Os08g0179000 protein	412						28 – 49	(98 – 385) Protein kinase		plasma membrane	Os08g0179000	Membrane-associated kinase-10	MAK10	High expression in flower, but low ubiquitous expression; down-regulated in response to drought in tolerant genotypes; down-regulated under submergence in Taikeng 9 seedlings.
LOC_Os12g44320	Os12g0640700	SD-2	GO:0006468 (protein phosphorylation)		1707	Os12t0640700-01	1 (1581)	0	Q0ILK0	Os12g0640700 protein	526						84 – 111	(181 – 460) Protein kinase		plasma membrane	Os12g0640700	Membrane-associated kinase-11	MAK11	Expresses in flower, root, and shoot; up-regulation in response to chilling in tolerant genotype.
Kinase (14)
LOC_Os04g14840	Os04g0225250	SD-2	GO:0006468 (protein phosphorylation)	Similar to H0315F07.6 protein.	789	Os04t0225250-00	1 (594)	0	A0A0P0W811	Os04g0225250 protein	197							(1 – 197) Protein kinase		mitochondrion	Os04g0225250	Kinase-like	Kinase-like	Kinase like; not expressed
LOC_Os04g54190	Os04g0634500	SD-1	GO:0006468 (protein phosphorylation)	Protein kinase, core domain containing protein.	3215	Os04t0634500-01	3 (62;151;288)	2	B7EJR3	Os04g0634500 protein	166							(1 – 132) Protein kinase		plastid	Os04g0634500	Kinase-like	OsRLCK166	Ubiquitous high expression; down-regulated in response to drought in tolerant genotypes.
LOC_Os04g56110	Os04g0655300	SD-2	GO:0006468 (protein phosphorylation)	Conserved hypothetical protein.	2563	Os04t0655300-01	1 (1263)	0	Q7XTD4	OSJNBb0022F16.11 protein	411							(75 – 365) Protein kinase		plasma membrane	Os04g0655300	N/A	OsRLCK168	Ubiquitous high expression; down-regulated in response to drought in tolerant rice genotype Nagina 22; down-regulated under submergence in japonica cultivar Taikeng 9 seedlings; up-regulated in response to Xanthomonas oryzae pv. oryzae in resistant rice genotype IRBB21.
LOC_Os06g34960	Os06g0541600	SD-1	GO:0006468 (protein phosphorylation)	Hypothetical conserved gene.	8090	Os06t0541600-00	2 (410;70)	1	C7J484	Os06g0541600 protein	199							(90 – 183) Pkinase_Tyr			Os06g0541600	N/A	OsRLCK206	High expression in carpel, pistil, and egg cell; down-regulated in response to chilling in tolerant rice genotype Volano.
LOC_Os06g47470	Os06g0689600	SD-1	GO:0006468 (protein phosphorylation)	Serine/threonine protein kinase-related domain containing protein.	4856	Os06t0689600-01	7 (429;53;83;182;202;238;187)	6	A0A0P0X0E5	Os06g0689600 protein	457							(233 – 457) Protein kinase		plasma membrane	Os06g0689600	N/A	OsRLCK214	High expression in root, but ubiquitous expression; up-regulated in response to drought in tolerant genotype Dagad desi; down-regulated under submergence; up-regulated in response to Xanthomonas oryzae pv. oryzae and B. glumae in resistant genotypes; up-regulated in response to R. solani in susceptible rice genotype
LOC_Os06g47530	Os06g0690200	SD-1	GO:0006468 (protein phosphorylation)	Protein kinase, catalytic domain domain containing protein.	4058	Os06t0690200-01	8 (432;53;86;188;202;259;154;279)	7	A0A0P0X0D3	Os06g0690200 protein	550							(237 – 519) Protein kinase		plasma membrane	Os06g0690200	N/A	OsRLCK215	High expression in root, but ubiquitous expression; up-regulated in response to drought, or chilling in tolerant genotypes; down-regulated under submergence.
LOC_Os07g20610	Os07g0301500	SD-1	GO:0006468 (protein phosphorylation)	Gnk2-homologous domain domain containing protein.	3847	Os07t0301500-00	6 (85;113;214;220;133;285)	5	A0A0P0X5A7	Os07g0301500 protein	349							(50 – 319) Protein kinase		plasma membrane	Os07g0301500	Membrane-associated kinase-12	MAK12	Specific expression in microgametophyte cell and pollen sperm.
LOC_Os07g34980	Os07g0534500	SD-1	GO:0006468 (protein phosphorylation)	Protein kinase, core domain containing protein.	3634	Os07t0534500-01	3 (784;102;71)	2	Q0D5U5	Os07g0534500 protein	342							(33 – 311) Protein kinase			Os07g0534500	Kinase-like	OsRLCK233	Expresses in flowers and seedlings; down-regulated in response to drought; up-regulated in response to chilling in tolerant genotypes; up-regulated in response to Xanthomonas oryzae pv. oryzae.
LOC_Os08g25430	Os08g0343000	SD-1	GO:0006468 (protein phosphorylation)	Protein kinase, core domain containing protein.	6514	Os08t0343000-01	9 (504;53;92;84;95;217;235;154;342) 9 (465;53;92;84;95;217;235;154;342)	8 8	Q0J6A8	Os08g0343000 protein	591							(260 – 538) Protein kinase		plasma membrane	Os08g0343000	N/A	OsRLCK251	High expression across all tissues; down-regulated under submergence; up-regulated in response to Xanthomonas oryzae pv. oryzae in resistant rice genotype.
LOC_Os11g25510	Os11g0441900	SD-2	GO:0006468 (protein phosphorylation)		1524	Os11t0441900-01	1 (1140)	0	Q53KF8	Os11g0441900 protein	379							(56 – 334) Protein kinase			Os11g0441900	Kinase-like	OsRLCK326	Leaf-specific expression; up-regulated in response to B. glumae in resistant genotype CL 161.
LOC_Os11g44660	Os11g0668800	SD-1	GO:0006468 (protein phosphorylation)	Similar to Protein kinase domain containing protein, expressed.	1668	Os11t0668800-00	5 (462;49;98;211;245)	4	B9G8M8	Os11g0668800 protein	354							(187 – 354) Protein kinase			Os11g0668800	Kinase-like	OsRLCK349	Protein kinase-like; root-specific expression
LOC_Os11g44690	Os11g0669200	SD-1	GO:0006468 (protein phosphorylation)		3160	Os11t0669200-00	9 (342;59;77;126;98;211;241;166;219)	8	A0A0P0Y5M9	Os11g0669200 protein	512							(218 – 501) Protein kinase		plasma membrane	Os11g0669200	Kinase-like	OsRLCK350	Expresses in flower, root, seed, and shoot; down-regulated in response to drought stress in Nonabokra genotype.
LOC_Os12g03680	Os12g0130600	SD-2	GO:0006468 (protein phosphorylation)		690	Os12t0130600-00	1 (690)	0	A0A0P0Y6M8	Os12g0130600 protein	229							(1 – 227) Protein kinase		plasma membrane	Os12g0130600	Kinase-like	Kinase-like	Protein kinase-like; not expressed
LOC_Os12g03680	Os12g0130701	SD-2	unknown		1992	Os12t0130701-00	4 (113;81;299;116)	3	A0A0N7KTI8	Os12g0130701 protein	202							(1-202) Protein Kinase			Os12g0130701	Kinase-like	Kinase-like	Protein kinase-like; not expressed
Kinases with additional GnK2 domain (10)
Gnk+Kinase (1)
LOC_Os01g38840	Os01g0568800	SD-1	GO:0006468 (protein phosphorylation)		7808	Os01t0568800-00	6 (510;248;148;211;244;247)	5	A0A0P0V4B7	Os01g0568800 protein	535							(286-535) Protein kinase	130-235	plasma membrane	Os01g0568800	GnK2 domain containing kinase-like	Gnk2-K1	Gnk2-K1; not expressed
GnK+TM+Kinase (1)
LOC_Os01g26390	Os01g0366300	SD-1	GO:0006468 (protein phosphorylation)		3735	Os01t0366300-01	7 (877;102;185;211;238;151;309)	6	Q5Z8B7	Os01g0366300 protein	690						298-321	(372-658) Protein kinase	14 – 121 and 126-232	plasma membrane	Os01g0366300	GnK2 domain containing receptor-like kinase-1	Gnk2RLK-1	Leaf-specific expression; up-regulated in response to drought in a tolerant genotype Nagina 22.
SP + Gnk + TM + Kinase (8)
LOC_Os01g36500	Os01g0545500	SD-1	GO:0006468 (protein phosphorylation)	Hypothetical conserved gene.	4556	Os01t0545500-01	8 (773;128;123;158;211;238;151;303)	7	A0A0P0V3S2	Os01g0545500 protein	694	(1-22) SP					306-328	(378-664) Protein kinase	21-128 and 150-264	plasma membrane	Os01g0545500	GnK2 domain containing receptor-like kinase-2	Gnk2RLK-2	Highly expressed in tetrad-microspore cells, but also shows ubiquitous expression.
LOC_Os01g38900	Os01g0568400	SD-1	GO:0006468 (protein phosphorylation)	Serine/threonine protein kinase-related domain containing protein.	1722	Os01t0568400-00	4 (34;247;103;300)	3	C7IXR0	Os01g0568400 protein	676	(1-24) SP					288-311	(355-641) Protein kinase	38-143 and 149-264		Os01g0568400	GnK2 domain containing receptor-like kinase-3	Gnk2RLK-3	Callus-specific expression.
LOC_Os07g35004	Os07g0534700	SD-1	GO:0006468 (protein phosphorylation)	Similar to SRK15 protein (Fragment).	5928	Os07t0534700-01	7 (829;111;176;211;238;151;309)	6	Q7XIS7	Os07g0534700 protein	674	(1 – 17) SP					283 – 307	(356 – 642) Protein kinase	35 – 138 and 151 – 257	plasma membrane	Os07g0534700	GnK2 domain containing receptor-like kinase-4	Gnk2RLK-4	High expression in root and seed, but low ubiquitous expression; up-regulated in response to drought, chilling, and R. solani in tolerant rice genotypes; down-regulated under submergence; and down-regulated in response to B. glumae in resistant rice genotype.
LOC_Os07g35140	Os07g0535800	SD-1	GO:0006468 (protein phosphorylation)	Protein kinase, catalytic domain domain containing protein.	4280	Os07t0535800-01	6 (832;111;193;212;238;208)	5	Q69W20	Os07g0535800 protein	597	(1 – 19) SP					285 – 307 and 573 – 594	(363 – 597) Protein kinase	22 – 130 and 147 – 255	plasma membrane	Os07g0535800	GnK2 domain containing receptor-like kinase-5	Gnk2RLK-5	High expression in shoot and seed, but ubiquitous expression; up-regulated in response to drought, chilling, and submergence in tolerant genotypes
LOC_Os07g47230	Os07g0668500	SD-1	GO:0006468 (protein phosphorylation)	Similar to Protein kinase domain containing protein, expressed.	2820	Os07t0668500-00	5 (814;165;176;214;56)	4	A0A0P0X9Z0	Os07g0668500 protein	474	(1 – 23) SP					298 – 317	(369 – 474) Protein kinase	30 – 139 and 145 – 254	plasma membrane	Os07g0668500	GnK2 domain containing receptor-like kinase-6	Gnk2RLK-6	High expression in root and shoot, but ubiquitous expression; differential expression under hypoxia and submergence
LOC_Os10g04720	Os10g0136400	SD-1	GO:0006468 (protein phosphorylation)	Similar to SRK5 protein (Fragment).	2830	Os10t0136400-00	6 (796;290;211;238;151;294)	5	A0A0P0XSB2	Os10g0136400 protein	659	(1 – 16) SP						(346 – 632) Protein kinase	17 – 122 and 131 – 239	plasma membrane	Os10g0136400	GnK2 domain containing receptor-like kinase-7	Gnk2RLK-7	Expresses in flower, leaf, seed, and shoot; down-regulated in response to chilling in tolerant rice genotype Volano; up-regulated in response to Xanthomonas oryzae pv. oryzae in resistant rice genotype.
LOC_Os10g04730	Os10g0136500	SD-1	GO:0006468 (protein phosphorylation)	Similar to Protein kinase domain containing protein.	5128	Os10t0136500-01	7 (772;102;182;211;241;151;309)	6	Q7XH16	Os10g0136500 protein	655	(1 – 23) SP					263 – 285	(336 – 625) Protein kinase	13 – 119 and 128 – 238	plasma membrane	Os10g0136500	GnK2 domain containing receptor-like kinase-8	Gnk2RLK-8	Expression in leaf, seed, and shoot; down-regulated in response to chilling stress in tolerant rice genotype Volano; up-regulated in response to Xanthomonas oryzae pv. oryzae in resistant rice genotype IRBB21.
LOC_Os11g38850	Os11g0601500	SD-1	GO:0006468 (protein phosphorylation)		3261	Os11t0601500-00	6 (1024;179;214;238;151;24)	5	Q0IRS6	Os11g0601500 protein	628	(1 – 23) SP					313 – 336	(385 – 628) Protein kinase	24 – 129 and 156 – 270		Os11g0601500	GnK2 domain containing receptor-like kinase-9	Gnk2RLK-9	Embryo-specific expression.
