# Supplementary material for: Beyond gene ontology (GO): using biocuration approach to improve the gene nomenclature and functional annotation of rice S-domain kinase subfamily
Source: PeerJ. 2021 Mar 15;9:e11052. doi: 10.7717/peerj.11052 (PMC7971086; doi:10.7717/peerj.11052)
Supplement: Supplemental Information 6 [file peerj-09-11052-s006.xls]

## Sheet: Data-from-EBI-Atlas
Supplementary Table 3: Tissue-specific expression data used in this study
Baseline tissue-specific data for 112 SD-RLK gene family members available in EBI's gene Expression ATLAS (www.ebi.ac.uk/gxa/plant/experiments)
# Expression in Transcripts Per Million (TPM) values
	E-GEOD-50777 (Anderson et al. 2013)			E-MTAB-4123 (Zhang et al. 2014)				E-MTAB-2037 (Sakai et al. 2011 )							E-MTAB-2039 (Davidson et al. 2012)
Gene ID	plant egg-1	pollen sperm-1	microgametophyte-1	shoot-2	anther-2	carpel-2	seed-2	seed-3	callus-3	root-3	shoot-3	leaf-3	pre-flowering panicle-3	post-flowering panicle-3	leaf-4	early inflorescence-4	emerging inflorescence-4	anther-4	pistil-4	seed 5 days-4	seed 10 days-4	plant embryo-4	endosperm-4
Os01g0113350		1		1	0.5	0.6	0.6			3	5	16	2	3	4		1
Os01g0155200								3	2			22								1	2	2	2
Os01g0222800	5	0.9	2		4	5	2	0.5	3	1	0.8		0.8	0.6		1	3	5	3	0.5		1
Os01g0223700	23	24	1	2	0.9	3	1	2	5	12	11	12	17	5	7	9	8	2	8	3	4	13	3
Os01g0223800	3	27	3		1	2		1	2	2	0.7		3	1		3	2	2	2	0.5	1	7
Os01g0223900	2			4	3	20	8	2	1	6	1		2	4		3	2	2	12	5		0.8
Os01g0224000	9		1	2	7	22	5	4	11	3	2		4	6	0.5	8	3	4	15	7	2	11	0.7
Os01g0366300												0.8		0.7
Os01g0568400									3
Os01g0587400				6	2	18	1	1	2	5	0.5	5	4	2	4	2	5		9	0.9
Os01g0642700	2	5	0.5	0.8		2	2	0.8	0.7					0.8			0.5
Os01g0648600		3		1		2				1	0.8					1	0.6		1			1	0.5
Os01g0668400	4					2	1	0.7	1	1	3	0.8	2	3	0.8	3	4		5	1		0.7
Os01g0668600	8					4	3	1		8	3	1	5	5	0.8	3	8		7	2		0.7
Os01g0668901	10	63	2		0.9	2	2	2	2	6	3	4	7	4	1	4	2	2	3	2	2	7
Os01g0669100				12						7	2	0.8			3
Os01g0670100				3	3	0.6	2	0.7	0.5	6	1	1		0.8	0.9		0.9	1	1
Os01g0670600	0.6	73	56		2		1	0.9	7	7			3	2			0.5	10		0.6		3
Os01g0783800	14	0.9		0.7	0.7	4	3	7	9	12	9	14	16	11	3	11	6	2	4	3	6	19	2
Os01g0784200			0.9
Os01g0784700			0.6									3			2
Os01g0870400												13			2
Os01g0885700		2										1
Os01g0889900	3			43	11	159	5	4	0.7	1	16	0.7	11	33	19	0.8	10	2	85	35		0.7
Os01g0890100		3	0.5													0.5
Os01g0890200	2				0.5									0.5
Os01g0890600	1		1	0.5				0.7			2	4	5	2	3	2	5		4
Os02g0472700	0.5					0.5	1	0.6	0.7		1	25	0.9	3	4		0.9
Os02g0710500				3		0.5	7	7	1	27	2	2		5	2	0.6	0.6			7	5	2	5
Os02g0767400		0.7	3		6	2				14				0.5				4
Os03g0221700		2		1			0.6			0.6	8	2	2	0.5	2	1	3			0.5
Os03g0422800	8		7	0.9	3	0.9	2	2	2	2	3	2	4	2	2	4	5	6	4	2	0.8	4
Os03g0556600							2	9		9	2	1	0.8	1	0.5	0.8		0.5		3	9	0.6	18
Os03g0828800	2	1	0.5	0.7					0.5		0.8	15	0.8	2	4		0.8	0.5	0.6			1
Os03g0838100	9	3		62	30	64	10	2	4	38	22	31	16	20	30	17	20	10	36	8	0.5	7
Os04g0103500	9	1		2		5	3		3	6	5	3	2	3	4	2	2		0.9	0.6		2
Os04g0103700	4	0.6		2		0.6	3	0.6		10	5	1	3	3		9	2	0.7	1			0.6
Os04g0201900	2			1		3	2	2	1	2	3	8	4	6	3	3	3	0.5	3	2	2	3
Os04g0202500	4	19	5			0.9				0.5			0.7
Os04g0202800		16	0.8	0.6	2		2						0.6	0.7			0.7	0.9
Os04g0226600												1		2			0.5
Os04g0303100	9					5	0.9	0.9	2	3	1	8	3	5	0.8	3	3		11	2		2
Os04g0356600						0.6				1
Os04g0419700											0.7	1
Os04g0419900	4	4		0.8		0.5	0.6	0.5		1	6	11	2	0.6	4	0.6	0.5	0.9	0.8	0.5		1
Os04g0420033												3			0.5
Os04g0420600	1	8	2		0.9	0.7	0.9	0.6		2	0.7	5	1	0.9	0.9	0.6	0.6	1	0.6		0.8	1
Os04g0420900	0.9	22	1	1		0.5	4	0.5		0.7		1	0.7	1	0.5	0.8	0.6	0.8	0.5		0.6
Os04g0475200		4		0.8			1				2	11	0.9	3	3		0.9		0.6		0.9
Os04g0506700										15
Os04g0631800	11	0.7	4	2		3	9	4	10	13	5	5	6	9	3	3	3	2	4	3	1	7	0.8
Os04g0632100	1	0.6		1			6	0.9			2	12	6	8	2		11
Os04g0632600		2					2	0.7		0.5		34		8
Os04g0632901												4		0.5
Os04g0633200												10		1	0.6
Os04g0633300	6	1	0.8		0.8	2	2	2	5	2	2		2	3	1	3	3	4	5	0.9		11
Os04g0633600	6	10	2			3	2	2	2	2	0.7	15	4	4	2	2	3	3	4	2	0.9	3
Os04g0633900		14				0.6				3
Os04g0634400		0.9			0.5					14
Os04g0634500	39	49	23	6	16	16	8	13	9	25	7	7	17	15	4	15	11	28	18	13	6	11	2
Os04g0655300	2			12	2	1	5	7	45	12	11	41	2	20	24		2	8	2	5	1	3	4
Os05g0165900	13			2	1	1	2	2	6	12	13	17	12	5	9	6	4		4	1	0.6	9
Os05g0166300				4					0.8	15	7	0.6	21	1	0.7		2
Os05g0501400							0.9	0.7						0.6				0.6		1	0.5
Os06g0164900	4	6	0.7		2	4	1	1	2	3	0.9	0.8	2	2	0.5	2	2	1	3	0.9		3
Os06g0165500	3	6	0.5		2	3	2	1		0.9		61	3	3	2	1	1	0.9	0.7	0.5	0.6	1
Os06g0241100							0.5					9		2
Os06g0494100				0.5						0.7	0.7		0.6
Os06g0496800	9			56	20	100	29	18	5	25	46	10	51	45	10	88	38	8	76	61	2	15
Os06g0541600	8			3	0.7	5	3			5					0.7
Os06g0551800	0.9	0.9		1		1			0.7		2			2	0.6	0.8	2		0.8			0.5
Os06g0575000	7		1	1	0.6	0.8	2	2	0.6	2	0.5	1	4	2	0.9	2	0.9	1	2	0.8	2	0.7
Os06g0575400	1									42						0.6
Os06g0602500	10	3	0.6	2	0.6	6	14	6	15	0.8	4	13	16	35	2	4	12	1	8	6	0.7	9
Os06g0620200				0.5												0.5						1
Os06g0689600	2	0.6		0.6		6	2	2	10	38	2	6		6	2		0.6		5	1		4
Os06g0690200	10	0.8	2	5	2	4	3	2	5	40	4	14	2	6	4	2	2	2	5	2	0.8	14	0.9
Os07g0141100									8													1
Os07g0301500		0.8	2
Os07g0534500																	0.7
Os07g0534700	2			0.7	0.5	1	4	1	1	4	1	3		2	2	0.5	0.6		0.8
Os07g0535800	0.8			6	0.6	11	6	1	3	4	4	3	2	4	6	0.9	6	0.8	4	7		1
Os07g0550500				3	1	0.6	2	3	7	3	4	2	2	4	3		2	1		5	0.6
Os07g0550900	0.5				2					0.5								2
Os07g0551300	28	16		18	12	64	22	13	17	55	35	20	34	25	22	52	38	19	61	17	1	16	0.8
Os07g0553633														0.5					0.6
Os07g0668500				0.5						5
Os08g0179000	18	27	5	0.6	1	3	1	3	3	2	4	1	7	4	2	1	1	4	2	0.7		5
Os08g0179150	1	3
Os08g0230800	4			0.7		1	2	0.7		1	1	22	2	6	2		1
Os08g0236400												0.5
Os08g0343000	17	54	2	3	22	13	16	7	7	1	7	16	17	22	4	8	28	13	14	9	1	5
Os09g0454900	2							0.8	3	6									0.5
Os09g0550300										4
Os09g0550600		1
Os09g0551251										15
Os09g0551400								0.6				1		1
Os09g0551500	0.7	3																				0.8
Os10g0101000							2		0.5	3	1	1	1	1					0.8
Os10g0136400		0.5		1			1				5	34	0.8	4	6		1
Os10g0136500				0.7			0.7					17		0.6	0.5
Os11g0133001				3				0.6	14
Os11g0133100				1			4	2	1				2	7			2
Os11g0133500									2	0.5
Os11g0441900												1
Os11g0601500																						2
Os11g0669200	0.7						0.6			4	1		0.5				0.7
Os12g0130300				2			2				0.5	0.6
Os12g0177800	11	10	39		2	2	0.6	2	2	8	0.9		6	3	0.5	3	3	10	5	1	0.6	9
Os12g0527700	8	1		4	2	15	2	2	5	6	4	1	7	7	1	18	8	1	15	4		13
Os12g0640700		2		0.6		0.9			0.6	35						1
Os05g0163500	4	8	1	0.2	0.7	0.6	0.6	0.8	0.8			1	1	0.6			0.9	0.6	0.6		0.6	4

## Sheet: Expression_data_from-Literature
Information about tissue-specific expression retrieved from literature review (15 genes not in Atlas data)
RAP_GeneID	Gene Symbol	Gene Expression	Reference (PMID / DOI)
Os01g0545500	OsRLCK36	preferentially expressed in Tetrad-microspore cells, expressed in many tissues	22046259
Os01g0783900		expressed in pollen	22046259			Atlas	112
Os04g0202300	LECRCK2	preferentially expressed in roots and reproductive tissue, expressed in all tissues	22046259			Literature	15
Os04g0632500	S-locus receptor-like kinase RLK11	preferentially expressed in Tetrad-microspore cells, expressed in many tissues	22046259
Os04g0633800	OsRLCK165	expressed in pollen	22046259			not expressed	9
Os04g0634000	S-locus glycoprotein family protein	preferentially expressed in roots and reproductive tissue	22046259			expressed under stress	8
Os04g0655000	S-locus-like receptor protein kinase	preferentially expressed in roots and reproductive tissue	22046259
Os05g0166600	S-domain receptor-like protein kinase	preferentially expressed in Tetrad-microspore cells, expressed in many tissues	22046259
Os07g0186200	OsSIK2	Preferential expression in leaf, sheath and roots, expressed in many tissues	PMID:22046259; PMID: 24143807
Os10g0342300	Receptor-like protein kinase	preferentially expressed in roots and reproductive tissue	22046259
Os11g0208700	receptor-like protein kinase	preferentially expressed in roots and reproductive tissue	22046259
Os11g0668800	OsRLCK349	Expressed in roots	21765177
Os12g0130200	S-locus-like receptor protein kinase	preferentially expressed in roots and reproductive tissue	22046259
Os12g0130500	D-mannose binding lectin family protein	preferential expression in Roots, expressed in many tissues	22046259
Os05g0166900	OsRLCK180	Expresses in root	PMID: 23324257
Differential genes expression data used in this study supports expression of the following genes in seedling or whole plant, however, tissue-specific expression profile is not available
Os01g0670300		up-regulated in IR24 in response to Xoo		truncated gene expressed in E-GEOD-43050 dataset.
Os01g0871000		upregulated in response to X. oryzae		https://www.ebi.ac.uk/gxa/experiments/E-GEOD-67588
Os04g0155500		up-regulated in response to Burkholderia glumae in suceptible rice genotype		https://www.ebi.ac.uk/gxa/experiments/E-MTAB-4406
Os04g0654800		expression under biotic and abiotic stress condition		ATLAS
Os06g0142650		down regulated in cold stress		https://www.ebi.ac.uk/gxa/experiments/E-GEOD-37940
Os09g0551150		Expressed in response to oxidative stress	PMID:20072620
Os09g0551201		up-regulated in cadmium stress; upregulated in B. glumae infection in suceptible rice genotype		https://www.ebi.ac.uk/gxa/experiments/E-MTAB-4306; https://www.ebi.ac.uk/gxa/experiments/E-MTAB-4406
Additional Information from literature review for genes present in Atlas data
Os01g0223800		The expression of OsESG1 could be induced by abiotic stress and treatment with PEG, NaCl and ABA. It shows ubiquitous expression but high expression in embryo and pollen sperm	PMID: 31779898
Os01g0669100		OsLSK1, a plasma membrane protein, is highly expressed in nodes of rice plants. The OsLSK1 expression changes in response to the exogenous application of growth hormones and abiotic stresses. Over-expression of an S-domain receptor-like kinase extracellular domain improves panicle architecture and grain yield in rice.	PMID: 26428067
Os01g0783800		S-Domain receptor like kinase SDS2, highly expressed across all tissues.	PMID: 30723146; PMID: 29576481
Os01g0890100		PSRK2 shows high expression in the nodes after the start-up of reproductive growth.	PMID: 30096253
Os06g0494100		PID2, Expresses in leaves, roots and stems in rice variety Digu resistant to blast disease.	PMID: 16709195; PMID: 25849162
Os09g0454900		upregulated in response to submergence and is target of TFs SUB1A and ERF66 but not by ERF67.	PMID: 30723146
Os12g0527700		This gene is upregulated in rice transgenic lines over-expressing SUB1A, ERF67 and ERF66 (PMID:30723146)	PMID: 30723146
Flower	Leaf	Shoot	Root	Seed	Reference (Pubmed ID)
Os01g0545500	Os01g0545500	Os01g0545500	Os01g0545500	Os01g0545500	PMID:22046259
Os04g0632500	Os04g0632500	Os04g0632500	Os04g0632500	Os04g0632500	PMID:22046259
Os01g0783900					PMID:22046259
Os04g0202300	Os04g0202300	Os04g0202300	Os04g0202300	Os04g0202300	PMID:22046259
Os04g0633800					PMID:22046259
Os04g0634000	Os04g0634000	Os04g0634000	Os04g0634000	Os04g0634000	PMID:22046259
Os04g0655000	Os04g0655000	Os04g0655000	Os04g0655000	Os04g0655000	PMID:22046259
Os05g0166600	Os05g0166600	Os05g0166600	Os05g0166600	Os05g0166600	PMID:22046259
Os07g0186200	Os07g0186200	Os07g0186200	Os07g0186200	Os07g0186200	PMID:22046259
Os10g0342300	Os10g0342300	Os10g0342300	Os10g0342300	Os10g0342300	PMID:22046259
Os11g0208700	Os11g0208700	Os11g0208700	Os11g0208700	Os11g0208700	PMID:22046259
Os12g0130200	Os12g0130200	Os12g0130200	Os12g0130200	Os12g0130200	PMID:22046259
Os12g0130500	Os12g0130500	Os12g0130500	Os12g0130500	Os12g0130500	PMID:22046259
			Os11g0668800		PMID: 21765177
