# Supplementary material for: Beyond gene ontology (GO): using biocuration approach to improve the gene nomenclature and functional annotation of rice S-domain kinase subfamily
Source: PeerJ. 2021 Mar 15;9:e11052. doi: 10.7717/peerj.11052 (PMC7971086; doi:10.7717/peerj.11052)
Supplement: Supplemental Information 7 [file peerj-09-11052-s007.xlsx]

## Sheet: 3-Xoo-Datasets
Supplementary Table 4: Differential expression data for SDRLK family genes in response to biotic stress
Differential expression of SD-RLK family genes in response to three strains of Xanthomonas oryzae pv oryzae (Xoo), BXO43 , BXO1002 (EPS-), and BXO1003 (LPS-, EPS-). Cutoff (log2-fold change 1.0 and adjusted p-value <= 0.05) are used. The adjusted p-value and T-statistic values are available at https://www.ebi.ac.uk/gxa/experiments/E-GEOD-61833						Differential expression of SD-RLK family genes in IR24 and Nipponbare cultivar of O. sativa in response to Xanthomonas oryzae virulent and nonvirulent strains.																					We extracted this data from Narsai et al. (2013) published in BMC Genomics, 14:93. PMID:23398910; DOI: 10.1186/1471-2164-14-93. The MSU gene IDs were converted to RAP Gene Ids for creating heat-map. The data from this study is available from Atlas (https://www.ebi.ac.uk/arrayexpress/experiments/E-GEOD-43050) but has labels are incorrect.
Dataset: E-GEOD-61833-A-AFFY-126 (https://www.ebi.ac.uk/gxa/experiments/E-GEOD-61833). Reference: Girija et al. (2017). Rice Leaf Transcriptional Profiling Suggests a Functional Interplay Between Xanthomonas oryzae pv. oryzae Lipopolysaccharide and Extracellular Polysaccharide in Modulation of Defense Responses During Infection. Mol. Plant. Microbe Interact., 30, 16-27.						Dataset: E-GEOD-36272-A-AFFY-12 (https://www.ebi.ac.uk/gxa/experiments/E-GEOD-36272). Cutoff (log2-fold change 1.0 and adjusted p-value <= 0.05) are used.																					Probe Set ID	MSU identifier		24 HPI - O. sativa IRBB21 (Resistant genotype)			96 HPI - O. sativa IRBB21 ( resistant genotype)			24 HPI - O. sativa IR24 (Susceptible genotype)		96 HPI - O. sativa IR24 (Susceptible genotype)
Gene ID	Xanthomonas oryzae pv oryzae BXO43 (wild type; LPS+, EPS+)' vs 'water'.foldChange	Xanthomonas oryzae pv oryzae BXO1002 (EPS-)' vs 'water'.foldChange	Xanthomonas oryzae pv oryzae BXO1003 (LPS-, EPS-)' vs 'water'.foldChange			Gene ID	IR24; X. oryzae_BLS303 (Xoc) vs IR24 mock	IR24; X. oryzae_PXO86 (wild-type Xoo) vs IR24 mock	IR24; X. oryzae_PXO99A(wild-type Xoo) vs IR24 mock	IR24; X. oryzae_PXO99A-2 vs IR24 mock	IR24; X. oryzae_PXO99AME5 (reduced virulence; unknown mutation in TALE) vs IR24 mock	IR24; X. oryzae PXO99AME1 (low virulence; pthXo1 and avrXa27 double mutant) vs IR24 mock	IR24; X. oryzae_PXO99AME2 (low virulence; pthXo1) vs IR24 mock	IR24; X. oryzae_PXO99AME7 (non-patthogenic, nonfunctional type III secretion system) vs IR24 mock	IR24; X. oryzae_T7174 (wild-type Xoo) vs IR24 mock		Nipponbare; X. oryzae_BLS303 (Xoc) vs Nipponbare mock	Nipponbare; X. oryzae_PXO86 (wild-type) vs Nipponbare mock	Nipponbare; X. oryzae_PXO99A(wild-type) vs Nipponbare mock	Nipponbare; X. oryzae_PXO99A-2 vs Nipponbare mock	Nipponbare; X. oryzae_PXO99AME5 (reduced virulence; unknown mutation in TALE) vs Nipponbare mock	Nipponbare; X. oryzae_PXO99AME1 (low virulence; pthXo1 and avrXa27 double mutant) vs Nipponbare mock	Nipponbare; X. oryzae_PXO99AME2 (low virulence; pthXo1) vs Nipponbare mock	Nipponbare; X. oryzae_PXO99AME7 (nonpathogenic strain; nonfunctional type III secretion system ) vs Nipponbare mock	Nipponbare; X. oryzae_T7174 (wild-type) vs Nipponbare mock				RAP GeneID	FC	Bayes.p	PPDE(<p)	FC	Bayes.p	PPDE(<p)	FC	Bayes.p	FC	Bayes.p
Os01g0668901	2.7	3.7	2.7			Os10g0136400											-1.3										Os.23398.1.S1_at	LOC_Os04g15580.1	Os04g0226600	4.57039	0.000125226	0.99505	3.48782	3.09289e-07	0.99996
Os01g0669100	1.5	1.8	1.8			Os10g0136500											-1.3										Os.28305.1.S1_at	LOC_Os04g56110.1	Os04g0655300	3.31616	2.14499e-06	0.999615	1.76766	0.000145472	0.997805
Os01g0670100	1.3	1.9	1.8			Os01g0223700														-1.2		-1.1					Os.23264.1.A1_at	LOC_Os10g04720.1	Os10g0136400	2.51258	1.76559e-05	0.998551
Os01g0783800	1.3	1.7	1.2			Os01g0784700														-2.4		-2	-2.2				Os.17809.1.S1_at	LOC_Os08g25430.1	Os08g0343000	2.41963	8.88983e-05	0.996	1.51124	0.00704225	0.970553
Os02g0472700	1.9	2	2			Os01g0890600											-1.2		-1.2		-1.3				-1.6		Os.8136.1.A1_at	LOC_Os06g40030.1	Os06g0602500	2.1616	0.000519323	0.98796	2.34445	1.91716e-05	0.999439
Os04g0103700		1.4				Os04g0420033												-1.7	-1.6	-2.8	-1.7	-2.1	-1.8				Os.18773.1.S1_at	LOC_Os03g62180.1	Os03g0838100				1.37046	0.00543798	0.975194
Os04g0226600	1.3	1.3	1.3			Os03g0221700			-2.1	-1.8	-2.2	-1.7															Os.20531.1.S1_at	LOC_Os04g54010.1	Os04g0632600				1.72072	0.000688272	0.993763
Os04g0356600	2.5	3.1	2.1			Os04g0419900					-1.1	-1.4															OsAffx.28152.2.S1_at	LOC_Os06g47470.1	Os06g0689600				1.28721	0.000653732	0.993974
Os04g0419900	1.6	2.3	1.5			Os06g0165500			-2		-2.1																Os.33894.1.S1_at	LOC_Os07g34980.1	Os07g0534500				2.42048	0.000143786	0.997822
Os04g0420900	1.1					Os07g0534700						-1.1	-1.1														Os.46730.1.S1_at	LOC_Os10g04730.1	Os10g0136500				1.48656	0.00114723	0.991215
Os04g0631800		1.5				Os08g0179000			-1.3	-1.6	-1.5																Os.38421.1.S1_at	LOC_Os01g57560.1	Os01g0784700				-2.56328	0.00046011	0.99524
Os05g0165900	1.4	1.7	1.3			Os04g0632600	-1.4		-1.3		-1.5						-1.8	-1.1	-1.4	-3.4	-2.4	-3.8	-2.8				Os.32819.1.S1_at	LOC_Os07g36590.1	Os07g0551300				-1.49766	0.00308593	0.982984
Os07g0534500		1.2				Os01g0670600												1.1			1.2						Os.52252.1.S1_at	LOC_Os12g34320.1	Os12g0527700									1.27414	0.0394796
Os07g0550500			1.3			Os03g0422800															1.3				1.5		OsAffx.2270.1.S1_at	LOC_Os01g48020.1	Os01g0670300									-1.03589	0.0466122
Os09g0454900		1.5				Os03g0556600														1.3		1.2	1.2		1.2
Os10g0101000		1.1	1.1			Os05g0166300												1.6	1.6	3	2.1	2.5	2.6	2.3	2.7
Os10g0342300	2.7	2.4	3			Os05g0165900		2.7			1.2				1.7		2.5	2.5	2.4	2.5	2.5	2.1	2.1	2	3.6
Os12g0527700		1.4	1.2			Os01g0669100		1.1										1.6		1.6	1.5	1.4	1.2	1.3
						Os06g0494100														2.1		2.3	2.3
						Os01g0783800		1.5			1.4
						Os02g0472700		1.8	1.2		1.7
						Os12g0527700		1.4						1.2
						Os07g0550900		2.6			1.9
						Os04g0419700						2	1.5
						Os04g0631800		1.9	1.3		1.2						1.7	2.3	2.4	1.9	2.4		1.3		3.2
						Os06g0496800			1.4	1.4	1.3	1.4
						Os07g0534500		4	3.2	3.3	3.8	1.2			1.9		-2	2.1	2		2.7				2.7
						Os06g0690200		1.5	1.3	1.7	1.6	1.3						1.1		1.2	1.4
						Os01g0668901		3.6	3.7	2.6	4.5				2.8			1.3	1.4	1.1	1.6				3.5
						Os10g0342300		1.4	1.4	1.4	2.4							3.3	2.7	2.6	4.4	1.4			2.6
						Os04g0103500		1.2	1.8	1.5	1.6														1.1
						Os04g0633300			1.7	1.8	2.1										2
						Os04g0103700		1.7			1.2														1.3
						Os04g0356600		1.7			1.3							2.3	2.7	1.8	3.2			1.5	3.1
						Os01g0670100	1.3	2.1	2.4	1.6	2.4				1.7						1.1				1.2
						Os02g0710500	1.1	1.4	1.1									1.1	1.2						1.6
						Os09g0454900			1.1														1.1
						Os04g0226600		2.7	2.2	2	2.6	1.1	1.1		1.3		-1.2
						Os04g0420900		1.8	1.7	1.9	1.7	1.2	1.6		1.1			1.6	1.5	1.1	1.9			1.1	1.5
						Os01g0668600	1.1	2.1	2.3	3	2.4	2	1.6		1.5
						Os06g0602500	2.1	2.4	2.6	2.5	2.8	1.8	1.5		2.4				1.1		1.6				1.6

## Sheet: E-MTAB-4406_B._glumae
Differential expression of SD-RLK family genes in CL 151 and CL 161. cultivar of O. sativa in response to Burkholderia glumae the causal agent of bacterial panicle blight disease in rice. Data is after 48 h after infection. Cutoff (log2-fold change 1.0 and adjusted p-value <= 0.05) are used.
Dataset: E-MTAB-4406 (https://www.ebi.ac.uk/gxa/experiments/E-MTAB-4406)
Reference: Magbanua et al. (2014). Transcriptomic dissection of the rice-Burkholderia glumae interaction. BMC Genomics, 15, 755.
	B. glumae' vs 'control' in 'moderately resistant CL 161 at 'seedling stage' .foldChange	B. glumae' vs 'control' in 'susceptible CL 151 cultivar of O. sativa at 'seedling stage' .foldChange	CL 161 vs 'CL 151' at 'flowering stage' .foldChange
Gene ID	CL 161 (R)	CL 151(S)	CL 161 vs CL 151
Os01g0113350	1.8
Os01g0155200	2.7
Os01g0222800			3.1
Os01g0223700		1.3
Os01g0223800		1.2
Os01g0223900	1.1	-1.5
Os01g0366300	3.6	3.7
Os01g0587400	1.4	1.4
Os01g0642700		2.4
Os01g0668400		-1.2
Os01g0668600	1.2
Os01g0668901	1.4	2.1
Os01g0669100	2.2	2.7
Os01g0670100	4.5	4.6
Os01g0670600	2.5	2.2
Os01g0783800		1.3
Os01g0784200	2.3	2.6
Os01g0885700	4.3	5.4
Os01g0889900	1.7		1.4
Os01g0890600	2.6	2.7
Os02g0472700	4.1	5
Os02g0710500	1.3	2.7
Os03g0221700			1.3
Os03g0556600	1.4	1.7	-1.9
Os04g0103500	2	4.2
Os04g0155500		3.5
Os04g0201900			1.2
Os04g0226600	3.1	3.4
Os04g0356600	2.7	4.3
Os04g0419900		1.6
Os04g0420600		1.4
Os04g0420900		1.4
Os04g0475200			-1.7
Os04g0631800	2.2	3.5
Os04g0632100		1.9
Os04g0633200			1.7
Os04g0633300	2.4	2.4
Os04g0633600		1.1
Os04g0634400	2.2	2.7
Os04g0654800	2.1	4.4
Os04g0655000		2.6
Os04g0655300	3.1	4.4
Os05g0166600	2.3	3.3
Os05g0501400		2.1
Os06g0164900	1.1	3.4
Os06g0541600	2.4	3.9
Os06g0551800		1.8
Os06g0602500	2.1	2.7
Os06g0689600	5	3.8	1.8
Os06g0690200	4.6	4.1
Os07g0534700	2.5	2.9	1.7
Os07g0535800	1.6	1.9
Os07g0550500	3.2	3.6
Os07g0550900	2.8	4.5	2
Os07g0551300		1.4
Os08g0230800	1.7	3.3
Os08g0343000	3.7	4
Os09g0454900	2	3.1
Os09g0550300	2.5	3
Os09g0551201	3.6	3.8
Os09g0551251	5.2	4.8
Os09g0551400	6.7	5.6
Os10g0101000	1.6	1.8
Os10g0136400		2.6
Os11g0133001	2.9	1.8	2.4
Os11g0441900	3.5	2.4
Os11g0601500		2.7
Os12g0130200			2.9
Os12g0130500	2.1	3.4
Os12g0527700		2
Os12g0640700		-1.8
Os05g0163500		2.6

## Sheet: E-MTAB-5025_RSV
Differential expression of SD-RLK family genes in O. sativa in response to Rice Stripe Virus (RSV)
Dataset: E-MTAB-5025 (https://www.ebi.ac.uk/gxa/experiments/E-MTAB-5025). Cutoff (log2-fold change 1.0 and adjusted p-value <= 0.05) are used.
Reference: Zhao et al. (2016). Different pathogenicities of Rice stripe virus from the insect vector and from viruliferous plants. New Phytol, 210, 196-207.
Gene ID	'Laodelphax striatella' vs 'none' .foldChange	microinjection with insect-derived Rice stripe virus' vs 'microinjection with extracts of nonviruliferous L. strialella ' .foldChange	'microinjection with plant-derived Rice stripe virus' vs 'microinjection with extracts of healthy plants' .foldChange
Os01g0113350	-1.7
Os01g0155200	2.5
Os01g0223800	1.4
Os01g0223900	1.2
Os01g0224000	1.2	1.4
Os01g0648600		-1.5
Os01g0668600		-1.3
Os01g0669100	-1.3
Os01g0670100		1.4
Os01g0670600		1.8
Os01g0870400	2.5
Os01g0889900	-1.2
Os01g0890600	-1.8	-1.4
Os02g0710500	1.1	1.8
Os03g0556600	1.1	1.3
Os04g0103500	1.1	1.5
Os04g0356600	-2.6
Os04g0419900		1.1
Os04g0420900	3.2	1.9
Os04g0475200		-1.2
Os04g0631800		1.1
Os04g0632100	1.3
Os04g0633200	1.9
Os04g0633300	-2.9
Os04g0654800	-2.2
Os06g0165500		-1.4
Os06g0494100	1.1
Os06g0602500	1.1
Os07g0535800		1.1
Os07g0550900	1.2	2.4
Os07g0551300		1.9	1.1
Os08g0179000	-2.3
Os09g0454900	2.8	1.8
Os10g0136400	1.5
Os10g0136500	1.7
Os11g0133001		-1.2
Os11g0133100	-2.5	-1.9
Os12g0130200	-3.9	-1.6
Os12g0130300	-3.8	-1.7
Os12g0527700	-2.1	-1.2
Os12g0640700	1.6

## Sheet: E-MTAB-6402_R. solani
Differential expression of SD-RLK family genes in CCDR (susceptible) and MCR (resistant) cultivars of O. sativa in response to Rhizoctonia solani
Dataset: E-MTAB-6402 (available at https://www.ebi.ac.uk/ena/data/view/ERS2106879-ERS2106902). (cutoff adjusted P-value of <0.05)
Reference: Al-Bader et al. (2019): https://doi.org/10.1101/625509)
R. solani testing in 2 genotypes
GeneID		Susceptible CCDR_3 days post infection	Susceptible CCDR_5 days post infecttion	Resistant MCR_3 days post infection	Resistant MCR_5 days post infection
Os01g0155200		0	0	0.755919	0
Os01g0223700		0	0	0.196368	0
Os01g0668400		0	0	-1.04009	0
Os01g0668901		0	0	1.60174	0
Os01g0670100		2.19818	0	1.44299	0
Os01g0784700		0	0	1.28845	0
Os01g0889900		0	0	2.22153	0
Os01g0890600		2.49959	0	-0.608847	0
Os02g0472700		0	0	1.11784	0
Os02g0710500		0	0	1.37238	0
Os03g0221700		0	0	0.519748	0
Os03g0422800		0	0	0.351919	0
Os03g0828800		0	0	0.704292	0
Os04g0103500		0	0	0.952305	0
Os04g0103700		0	0	0.577482	0
Os04g0201900		0	0	-1.18871	0
Os04g0303100		0	0	0.14688	0
Os04g0420600		0	0	-0.995088	0
Os04g0631800		0	0	-1.43103	0
Os04g0632100		0	0	-0.898264	0
Os04g0632600		0	0	-0.313017	0
Os04g0632901		0	0	-1.98327	0
Os04g0633200		0	0	-0.0680884	0
Os04g0633600		0	0	-0.476501	0
Os04g0655300		0	0	-0.13115	0
Os06g0164900		0	0	-0.823438	0
Os06g0165500		0	0	0.21503	0
Os06g0602500		0	0	0.768072	0
Os06g0689600		2.39147	0	0.606238	0
Os06g0690200		0	0	0.0702319	0
Os07g0534500		0	0	0.43692	0
Os07g0534700		0	0	1.11525	0
Os07g0550500		0	0	1.45994	2.39865
Os07g0550900		0	0	0.966101	0
Os07g0551300		0	0	-0.272444	0
Os08g0230800		0	0	0.230645	0
Os08g0236400		0	0	0.0255614	0
Os10g0136400		0	0	-0.297091	0
Os11g0133100		0	0	0.821912	0
