# Supplementary material for: Beyond gene ontology (GO): using biocuration approach to improve the gene nomenclature and functional annotation of rice S-domain kinase subfamily
Source: PeerJ. 2021 Mar 15;9:e11052. doi: 10.7717/peerj.11052 (PMC7971086; doi:10.7717/peerj.11052)
Supplement: Supplemental Information 8 [file peerj-09-11052-s008.xlsx]

## Sheet: Drought-4-sets
These EMBL-EBI Expression Atlas datasets are pprocessed similarly for differential gene expression (cutoff values log2-fold change 1.0 and adjusted p value = 0.05)
	Dataset 1: E-GEOD-41647 (seedings)					Dataset 2: E-MTAB-4994		Dataset 3: E-MTAB-3230 (lseedlings)			Dataset 4: E-MTAB-7317: ArrayExpress https://www.ebi.ac.uk/arrayexpress/experiments/E-MTAB-7317
	'drought environment' vs 'control' in 'susceptible to drought environment' at '3 hour'.foldChange	'drought environment' vs 'control' in 'susceptible to drought environment' at '6 hour'.foldChange	'drought environment' vs 'control' in 'tolerant to drought environment' at '3 hour'.foldChange	'drought environment' vs 'control' in 'tolerant to drought environment' at '6 hour'.foldChange		Nagina 22_'drought' vs 'normal'.foldChange		Nagina22_'PEG Stress' vs 'normal'.foldChange	ewst1_'PEG Stress' vs 'normal'.foldChange
	Dataset: E-GEOD-41647 (seedings)					Dataset: E-MTAB-4994		E-MTAB-3230 (lseedlings)			E-MTAB-7317 (seedlings)
Gene Name	IR20 (susceptible)_3 h	IR20 (susceptible)_6 h	Dagad deshi (tolerant)_3 h	Dagad deshi (tolerant)_6 h		Nagina 22_flag leaf		Nagina22 (S)	ewst1 (T)		Nagina22_Early	Nagina22_Late	Nonabokra_Early	Nonabokra_Late
	IR20_3 h	IR20_6 h	Dagad deshi_3 h	Dagad deshi_6 h		N22_flag leaf		N22	N22_ewst1		N22_day2	Nagina22_day3	Nonabokra_day2	Nonabokra_day3
Os03g0828800		-1.2				-1.7					0	0	-0.894889	0
Os04g0226600		-2.7
Os06g0551800	-1.2	-1.3									-2.25044	0	-2.94617	1.93342
Os01g0890600	-1.8	-2.2									-1.18559	0	0	0
Os01g0223700			-1.1			-1.2			-1.4		-0.663171	0	-1.38451	1.10917
Os01g0669100			-1.3	-1.4					-1.1
Os03g0422800			-1.5	-1.2		-1.4
Os06g0575400			-1.8	-1.7
Os08g0179000			-1.8	-1.6							2.11136	-2.77444	-3.01772	0
Os03g0221700	-1.1	-1.2	-1.3	-1.7		-1.2		-1.1	-1.9		-0.927814	0	-2.47523	1.81801
Os01g0784700	-1.3	-3.1	-2.4	-2.8		-3.4					0	0	-1.34479	1.52714
Os04g0420033								-1.6	-2.3		0	-1.90814	0	0
Os04g0634400						-2.1		-1.5	-1.3		1.46696	0	0	-3.80862
Os02g0710500						-1.2					0	0	1.50592	0
Os04g0419900						-1.4					-1.33058	0	-1.6382	0
Os06g0165500						-1.5			-2.1		1.47561	-1.7193	-2.89908	2.21756
Os04g0419700	1.2					-2.3
Os06g0496800		1.1				2.6
Os04g0420900			1.1
Os04g0632100			1.1								0.668601	0	0	0
Os09g0454900			1.2			2.1					0	2.51382	4.53325	0
Os04g0632600				1.2							0	0	-3.12297	2.86976
Os06g0689600				1.2
Os06g0690200			1.2	1.3		1.2					0.884125	0	1.85953	0
Os06g0241100			1.4	1.6
Os06g0602500			1.7	1.6		1.3
Os01g0224000			1.8	2		2.5					0	3.39352	5.62865	-4.28627
Os01g0885700			2.1	2.4
Os05g0501400		2	1.4	1.7
Os04g0103500		1.3	1.7	2		2.3					1.81729	0	1.71973	0
Os07g0550500		1.8	2.4	2.6							-0.720863	0	0	0
Os07g0550900									1.5
Os07g0551300									1.5		0	0	-0.899271	0
Os04g0631800						2.6					0	0	1.6166	-1.45848
Os04g0103700						1.3
Os01g0155200						1.6					0	0	5.55828	-2.91332
Os01g0670100						1.8					-1.57818	0	1.19377	0
Os10g0136400											0.848842	-1.20517	-1.93512	1.6487
Os11g0133001											0	0	8.99939	-5.66078
Os11g0669200											0	0	-4.10801	0
Os12g0130300											4.95962	0	0	0
Os12g0130800											5.18248	0	0	0
Os12g0527700											-2.78895	0	0	0
Os07g0534500											-1.69852	0	-2.66664	0
Os07g0534700											0.557307	0	-3.37638	2.31917
Os07g0535800											0	0	2.42917	-1.23245
Os04g0634500											-0.751327	0	-0.851209	0
Os04g0655300											-0.742593	0	0	0
Os05g0166300											-3.16224	0	0	0
Os04g0632901											0	0	-2.26391	1.7406
Os04g0633200											0	0	0	1.34551
Os04g0633600											1.84228	0	0	0
Os04g0201900											2.68674	0	3.93787	-1.55979
Os04g0303100											4.33241	0	5.19338	0
Os01g0366300											4.99496	0	0	0
Os01g0648600											0	0	-5.46542	0
Os01g0222800											5.65891	0	0	0
Os01g0223800											-1.11091	0	0	0
Os01g0223900											0	0	4.04648	0

## Sheet: Submergence-2-sets
Submergence Data set1: Table S2 from Hussain et al. (2016).Comparative Transcriptional Profiling of Primed and Non-primed rice (Oryza sativa L. Indica cultivar Huanghuazhan) seedlings under Submergence Stress. Front Plant Sci. 7: 1125 (PMID: 27516766).																										Submergence Dataset 2: A list of SD-RLK family genes that show differential expression in the Oryza sativa L. japonica cultivar Taikeng 9 under submergence with and without polar auxin transport inhibitor 2,3,5-triiodobenzoic acid (TIBA).
Reference link: https://www.ncbi.nlm.nih.gov/pmc/articles/PMC4964843/
List of differentially expressed SD-RLK gene family members with significantly increased and decreased expression (Fold change > |2|, FDR<0.05) .																										Data source: Supplement table 3 from Wu and Yang (2020). Comprehensive Transcriptomic Analysis of Auxin Responses in Submerged Rice Coleoptile Growth . Int J Mol Sci. 2020 Feb; 21(4): 1292. (PMID: 32075118) (https://www.ncbi.nlm.nih.gov/pmc/articles/PMC7072898)
The shaded columns were added to calculate Log2 Fold change (the original paper only contained Fold Change).																										GeneID	Taikeng 9_SUB	Taikeng 9 _SUB+TIBA	SUB+TIBA vs SUB (Fold Change)	log2 Fold Change (SUB+TIBA vs SUB )	FDR
Gene ID	RAP GeneID	NP+Control-R1_CDPV	NP+Control-R2_CDPV	NP+Sub-R1_CDPV	NP+Sub-R2_CDPV	NP+Control vs NP+Sub (Fold Change)	NP+Control vs NP+Sub (FDR)	Average of NP+Control (R1+R2)	Average of NP+Sub_CDPV	Log2 Fold change (NP+Sub vs NP+Control)	Log2 Fold change (NP+contrrol vs NP+sub)	Se+Sub-R1_CDPV	Se+Sub-R1_CDPV	Ave_Se+Sub_CDPV	Se+Sub vs NP+Sub (Fold Change)	FDR (Se+Sub vs NP+Sub )	Log2 Fold Change_Se+Sub vs NP+Sub	SA+Sub-R1_CDPV	SA+Sub-R2_CDPV	SA+Sub vs NP+Sub (Fold Change)	FDR (SA+Sub vs NP+Sub)	Log2 fold Change_SA+Sub vs NP+Sub				Os06g0689600	0.53	4.86	9.16981	3.19689	1.57e-10
LOC_Os01g48000.1	Os01g0670100	346.333	327.357	2285.11	2653.53	0.136412	0.0035394	336.845	2469.32	2.87396	-2.87396															Os04g0655300	0.98	5.61	5.72449	2.51715	6.83e-14
LOC_Os01g48040.1	Os01g0670600	54.6842	58.2964	294.509	270.528	0.199952	0.0373978	56.4903	282.519	2.32227	-2.32227															Os06g0241100	1.66	6.35	3.8253	1.93557	7.67e-08
LOC_Os04g34250.1	Os04g0419700	130.474	134.53	0	0	132.502	3.03e-07	132.502	1	-7.04987	7.04987															Os06g0575000	1.1	3.98	3.61818	1.85526	0.00130726
LOC_Os05g07470.1	Os05g0166900	1.91874	4.48434	86.3421	115.268	0.0317597	0.000194008	3.20154	100.805	4.97666	-4.97666															Os07g0534700	4.85	15.01	3.09485	1.62987	1.54e-18
LOC_Os06g06930.1	Os06g0164900	44.1311	20.1795	391.497	269.352	0.0973152	0.00122657	32.1553	330.424	3.36119	-3.36119															Os06g0602500	2.38	6.89	2.89496	1.53354	1.14e-09
LOC_Os06g37690.1	Os06g0575000	34.5374	31.3904	253.113	217.599	0.14006	0.00719635	32.9639	235.356	2.83588	-2.83588															Os08g0343000	3.34	8.86	2.65269	1.40746	2.63e-08
LOC_Os06g37750.1	Os06g0575400	35.4967	30.2693	246.016	281.114	0.124762	0.00526313	32.883	263.565	3.00274	-3.00274															Os04g0420600	0.82	2.16	2.63415	1.39734	0.00466752
LOC_Os10g01100.1	Os10g0101000	986.234	974.223	4195.28	4168.48	0.234399	0.0479433	980.228	4181.88	2.09296	-2.09296															Os01g0668901	1.46	3.17	2.17123	1.11851	0.00368324
LOC_Os12g03670.1	Os12g0130500	2.87811	1.12109	50.8591	18.8193	0.0573951	0.0199457	1.9996	34.8392	4.12293	-4.12293															Os06g0690200	1.77	3.58	2.0226	1.01621	0.00897695
LOC_Os02g52850.1	Os02g0767400	166.931	133.409	870.518	893.919	0.170218	0.0137965	150.17	882.218	2.55454	-2.55454							201.584	140.74	0.194013	0.0415164	-2.36578				Os07g0141100	2.94	5.9	2.0068	1.0049	0.00701062
LOC_Os06g13320.1	Os06g0241100	38.3748	21.3006	214.081	228.185	0.134931	0.0121289	29.8377	221.133	2.8897	-2.8897							6.10859	0.991125	0.0160531	2.59e-06	-5.96101				Os04g0202300	4.28	7.68	1.79439	0.843496	0.000939824
LOC_Os06g30130.1	Os06g0496800	1178.11	1206.29	177.415	204.66	6.24064	0.00846338	1192.2	191.038	-2.64169	2.64169	1423.65	1299.09	1361.37	7.12619	0.00684825	2.83313	1198.05	1120.96	6.06951	0.0153546	2.60158				Os05g0501400	4.59	7.99	1.74074	0.799701	0.000203262
LOC_Os07g04810.1	Os07g0141100	86.3434	75.1127	1992.97	2136	0.0391033	2.01e-06	80.7281	2064.48	4.67656	-4.67656							383.314	250.755	0.153566	0.0131947	-2.70307				Os07g0551300	9.86	15.47	1.56897	0.649814	5.28e-06
LOC_Os01g47900.1	Os01g0669100			93.4387	69.3963	0.0122824		1	81.4175	6.34727	-6.34727	496.342	337.567	416.954	5.12119	0.0441315	2.35648									Os08g0179000	0.69	1.71	2.47826	1.30933	0.0020482
LOC_Os03g12150.1	Os03g0221700			73.3317	63.5153	0.0146149		1	68.4235	6.09642	-6.09642	393.977	390.536	392.256	5.73278	0.0272962	2.51923									Os04g0103700	7.76	4.77	0.614691	-0.702067	0.00124052
LOC_Os04g34270.1	Os04g0419900			86.3421	88.2157	0.0114575		1	87.2789	6.44756	-6.44756	325.16	579.969	452.564	5.18527	0.0406784	2.37442									Os07g0535800	6.44	1.75	0.271739	-1.87971	7.05e-09
LOC_Os12g03650.1	Os12g0130300							1	1			92.9028	61.9471	77.425	6599	1.64e-05	6.27473	45.8144	33.6983	2645	0.000279461	11.3691				Os02g0710500	3.06	0.76	0.248366	-2.00946	0.000425797
LOC_Os01g66610.1	Os01g0889900	3.54831	7.05725	341.318	301.302	0.0165036	2.79e-07	5.30278	321.31	5.92107	-5.92107															Os01g0587400	0.91	0.17	0.186813	-2.42033	0.00379292
LOC_Os05g07420.1	Os05g0166300	66.2351	51.7532	643.693	432.131	0.109672	0.00259049	58.9941	537.912	3.18873	-3.18873															Os05g0166300	0.86	0.12	0.139535	-2.8413	0.00544472
Data from Hussain et al. (2016) used for creating SD-RLK heat map
Gene ID	Log2 Fold change (NP+Sub vs NP+Control)	Log2 Fold change (NP+contrrol vs NP+sub)	Log2 Fold Change_Se+Sub vs NP+Sub	Log2 fold Change_SA+Sub vs NP+Sub
Gene ID	NP+Sub vs NP_Control	NP_Control vs NP+Sub	Se+Sub vs NP+Sub	SA+Sub vs NP+Sub
Os01g0670100	2.87396	-2.87396
Os01g0670600	2.32227	-2.32227
Os04g0419700	-7.04987	7.04987
Os05g0166900	4.97666	-4.97666
Os06g0164900	3.36119	-3.36119
Os06g0575000	2.83588	-2.83588
Os06g0575400	3.00274	-3.00274
Os10g0101000	2.09296	-2.09296
Os12g0130500	4.12293	-4.12293
Os02g0767400	2.55454	-2.55454		-2.36578
Os06g0241100	2.8897	-2.8897		-5.96101
Os06g0496800	-2.64169	2.64169	2.83313	2.60158
Os07g0141100	4.67656	-4.67656		-2.70307
Os01g0669100	6.34727	-6.34727	2.35648
Os03g0221700	6.09642	-6.09642	2.51923
Os04g0419900	6.44756	-6.44756	2.37442
Os12g0130300			6.27473	11.3691
Os01g0889900	5.92107	-5.92107
Os05g0166300	3.18873	-3.18873

## Sheet: Cold-2-sets
Supplementary Table 5: Differential expression data for SDRRLK family genes in response to abiotic stress treatments
These twoo EMBL-EBI Expression Atlas datasets are processed similarly for differential gene expression (cutoff values log2-fold change 1.0 and adjusted p value= 0.05)
Dataset 1: E-GEOD-38023 (https://www.ebi.ac.uk/gxa/experiments/E-GEOD-38023)															Dataset 2: E-MATB-5941 available at https://www.ebi.ac.uk/arrayexpress/experiments/E-MTAB-5941: Chilling stress; RNA-seq data:
Reference: Zhang et al. 2012: Comparative Transcriptome Profiling of Chilling Stress Responsiveness in Two Contrasting Rice Genotypes. PLOS ONE; https://doi.org/10.1371/journal.pone.0043274 (PMID: PMID:22912843)															Reference: Buti et al. (2018). Transcriptome profiling of short-term response to chilling stress in tolerant and sensitive Oryza sativa ssp. Japonica seedlings. Functional & Integrative Genomics, 05 Jun 2018, 18(6):627-644								PMID: 29876699
chilling-tolerant Li-Jiang-Xin-Tuan-He-Gu (LTH) and chilling-sensitive IR29															Thaibonnet (chilling susceptible) and Volano (chilling tolerant) genotypes.
	'cold stress; sensitive to chilling; 2 hour' vs 'control; sensitive to chilling'.foldChange	'cold stress; sensitive to chilling; 8 hour' vs 'control; sensitive to chilling'.foldChange	'cold stress; sensitive to chilling; 24 hour' vs 'control; sensitive to chilling'.foldChange	'cold stress; sensitive to chilling; 48 hour' vs 'control; sensitive to chilling'.foldChange	'cold stress; tolerant to chilling; 2 hour' vs 'control; tolerant to chilling'.foldChange	cold stress; tolerant to chilling; 8 hour' vs 'control; tolerant to chilling'.foldChange	'cold stress; tolerant to chilling; 24 hour' vs 'control; tolerant to chilling'.foldChange	'cold stress; tolerant to chilling; 48 hour' vs 'control; tolerant to chilling'.foldChange	'recovery from cold stress; sensitive to chilling; 24 hour' vs 'control; sensitive to chilling'.foldChange	'recovery from cold stress; tolerant to chilling; 24 hour' vs 'control; tolerant to chilling'.foldChange					Gene ID	cold temperature regimen; 2 hour' vs 'none; 0 hour' in 'Thaibonnet' .foldChange	'cold temperature regimen; 10 hour' vs 'none; 0 hour' in 'Thaibonnet' .foldChange	'cold temperature regimen; 2 hour' vs 'none; 0 hour' in 'Volano' .foldChange	'cold temperature regimen; 10 hour' vs 'none; 0 hour' in 'Volano' .foldChange	'Volano' vs 'Thaibonnet' in 'none' at '0 hour' .foldChange	Volano' vs 'Thaibonnet' in 'cold temperature regimen' at '2 hour' .foldChange	'Volano' vs 'Thaibonnet' in 'cold temperature regimen' at '10 hour' .foldChange
Gene Name	IR29-2 h	IR29-8 h	IR29-24 h	IR29-48 h	LTH-2 h	LTH-8 h	LTH-24 h	LTH-48 h	IR29- 24 h (R)	LTH-24 h (R)						Thaibonnet_2 h (S)	Thaibonnet_10 h	Volano_2h(T)	Volano_10 h	Volano (R) vs Thaibonnet (S)_0 h	Volano(R) vs Thaibonnet (S)__2 h	Volano vs Thaibonnet_10 h
Os01g0669100				-1.2					-1.4						Os10g0136500					-1.5	-1.9	-1.7
Os08g0179000	-1.3								-1.5						Os06g0541600					-1.5	-2.5	-2.4
Os01g0890600									-1.6						Os10g0136400			-1.1	-1.1	-1.5	-2.4	-3.1
Os06g0142650		-1.1													Os01g0113350			-1.2
Os01g0223700		-1.3	-1.2	-1.4											Os04g0420600	-1.1
Os07g0534500	-1.7	-1.8	-2	-2.1											Os03g0221700	-1.3
Os06g0165500	-1.6	-1.9	-1.6	-1.9					-1.6						Os06g0165500	-1.4		-1.3
Os10g0136400	-1.2	-2.2	-2	-2.5					-2						Os01g0870400	-1.6	-1.1	-1.4
Os06g0551800		-1.1	-1.1	-1.3					-2						Os04g0633300		-1.2				-1.1
Os05g0166300						-1.9	-2.3	-2.8							Os04g0633600		-1.4			-1.2
Os01g0889900						-1.2	-3.1	-2.4							Os04g0633200		-1.2
Os04g0419700		-2.2	-2.8	-3.3	-1.2	-2.2	-2.4	-2.6	-4.4						Os01g0670100		-1.3
Os04g0420033	-1.4	-1.4	-1.6	-1.6	-1.4	-1.5	-1.5	-1.3	-1.6						Os01g0783800		-1.4
Os03g0221700	-1.3	-1.8	-1.6	-1.5	-1.2	-1.3	-1.4	-1.3	-2.8						Os03g0828800		-1.4
Os10g0136500	-1.7	-2.6	-2.7	-3			-1.3	-1.4	-2.9	-1.1					Os04g0303100		-1.4
Os01g0784700		-1.5	-1.3	-1.6	-1.3	-2.2			-4.3						Os01g0587400		-1.8
Os03g0828800		-1.5	-1.5	-1.5				-1.1	-2.3						Os01g0668400		-1.4		-1.1
Os04g0632600		-1.5	-1.3	-1.5		1.5	2.3	2.7	-3.4						Os01g0223700		-1.4		-1.3
Os04g0419900					4	4.3	3.8	3.5	-1.4						Os08g0179000		-1.4		-1.7
Os06g0602500				-1.3	1.8	1.3	1.5	1.9	1.5						Os06g0575000		-2.6		-1.6
Os01g0223900		1.2						-1.6							Os01g0668901		-2.7		-2.6
Os06g0575400		1.2													Os01g0890600		-1.8		-2.4		-1.3
Os01g0670600		1.8													Os12g0527700		-2.2		-1.9		-1.8
Os07g0141100	1.3	1.4													Os04g0475200	-1.7	-2.1	-1.8	-2.2
Os07g0550900			1.3	1.1											Os01g0668600	-1.3	-2.5	-1.7	-1.8
Os04g0632500	1.4		1.1												Os05g0166300			-1.1	-2.3	1.7	1.6
Os12g0177800				1.6											Os03g0422800	1.5	-1.1	1.6
Os04g0633300									1.2						Os04g0419900			2.6			1.8
Os05g0501400									1.3						Os06g0164900						1.2
Os04g0655300									1.5						Os02g0710500		1.5
Os10g0342300									1.7						Os03g0556600		1.6
Os01g0784200									1.7						Os09g0454900		1.6
Os01g0224000					1.1				2.4						Os01g0224000		1.9
Os01g0668901									3	1.6					Os01g0885700		2.2
Os03g0556600								2	3.5						Os01g0223900	1.1	1.9
Os06g0241100	1.8	1.1					2.1	2.8							Os05g0501400	2.1	2	1.3
Os02g0472700	1.5				1.2										Os06g0551800	1.6
Os10g0101000					1.4										Os07g0534500							1.1
Os02g0767400				1.2					1.4						Os04g0632600				1.8
Os12g0640700								2.5							Os04g0202500				1.6
Os01g0155200							1.1	1.8							Os01g0669100				1.5			1.2
Os03g0422800					1.3	1.5	1.2								Os06g0602500				1.8			1.4
Os06g0690200					1.5	1.7	1.6	1.1							Os07g0534700		1.1		2.1			1.5
Os07g0534700						1.1	1.6	2.4							Os06g0690200		1.1		1.3
Os01g0885700					1.2	1.6	2	2.6	2.3						Os06g0494100		1.6		2.2
Os04g0420900							1.1	2.6	4.6	3.1					Os03g0838100		1.5		2
Os03g0838100	1.1				1.4	1.5	1.6	1.8							Os04g0103700		1.6		2
Os01g0670100	1.4				2.3	1.9	1.7	1.8	1.3						Os04g0103500		1.9		1.4
Os09g0454900	1.5				3.2	2.1		1.7	3.6	1.5					Os06g0496800		2.1		2.2
Os04g0103500	1.1				2.5		1.4	1.7	2.8	1.2					Os07g0553633		1.6	1.3	2.1
Os02g0710500			1.5	2.1	2.1	1.9	2.2	2.3	3.7	1.9					Os04g0631800		1.9	1.4	2.6
Os04g0631800	1.8	1.3	1.3	2	3.3	3	3	3.9	2.5	2.1					Os04g0632100		1.6	1.4	2.6		1.5
Os04g0103700	1.3	1.5		1.1	2.8	2.2	2.1	1.8	1.6						Os07g0535800		1.1	1.3	2.1		1.2	1.3
Os05g0165900	3.3	2.5	4.7	6	3.2	3.1	3.3	3.7	2.9						Os07g0550900	1.2	1.5	1.6	2
Os07g0551300	2.1	1.7	1.7	1.9	1.5	1.1	1.2	1.4							Os07g0551300	1.8	2	2.5	1.8
Os06g0496800		1.5	1.8	2		1.4	1.8	2.2
Os04g0356600	1.4	1.3			1.5	1.2	1.9	2.5
Os06g0494100	1.2			1.1	2.6	2.1	2	2.5
Os04g0632100	1.7				2.8	2.2	2.6	3.5
